# Supplementary material for: Role of tetrel bonds in the supramolecular architecture of tetranuclear Pb(ii)[LL′thiophene carboxylate] complexes – an experimental and computational study
Source: Royal Society of Chemistry journal article supplement (doi:10.1039/d4ce00466c), 2024-01-01

## Electronic Supplementary Information

### **Role of Tetrel bonds in the Supramolecular Architecture of Tetranuclear Pb(II)[LL'Thiophene carboxylate] Complexes – An Experimental and Computational Study**

Robert Swinton Darius<sup>a</sup>, H Giftha Evangeline<sup>a</sup>, Franc Perdih<sup>b</sup> and, Swaminathan Angeline Vedha<sup>a\*</sup>

<sup>a</sup> PG and Research Department of Chemistry, Bishop Heber College, Affiliated to Bharathidasan University. e-mail: [angeline.ch@bhc.edu.in](mailto:angeline.ch@bhc.edu.in)

<sup>b</sup> Faculty of Chemistry and Chemical Technology, University of Ljubljana, Vecna pot, 113, PO Box 537, SI-1000 Ljubljana, Slovenia. E-mail: [Franc.Perdih@fkkt.uni-lj.si](mailto:Franc.Perdih@fkkt.uni-lj.si)

#### **Tables**

1. Table S1: Coordinates of complexes I -V
2. Table S2: RMSD of complex I
3. Table S3: Bite angles of complex I
4. Table S4: Jeffery's classification of Hydrogen Bonds
5. Table S5: Comparison of total energies of Complexes I, III, IV and V computed at BVP86/LanL2DZ basis set.
6. Table S6: Tetrel bond lengths (Å) in the structures of PbII complexes described in literature and in this work.
7. TablesS7: Electron density ( $\rho$ ) of Pb tetrel bonds reported in literature and in present work

#### **Figures**

1. Figure S1: ORTEP view of complex I with displacement ellipsoids at a 50% probability level
2. Figure S2: Schematic representation of (i) Hemi-directional and (ii) Holo-directional
3. Figure S3: A view of three-dimensional supramolecular architecture in the complex (I) along c-axis and stacked along b-axis in close packed geometry.
4. Figure S4: A view of three-dimensional supramolecular architecture in the complex (I) along c-axis and stacked along b-axis in open packed geometry.
5. Figure S5: Molecular view of (i) AB and (ii) AC dimers in close packed structures
6. Figure S6: Molecular view of (i) AB and (ii) AC dimers in open packed structures
7. Figure S7: Molecular view of (i) AB and (ii) AC dimers of close packed complex IA where the Br atom involved in tetrel bond is replaced by H.
8. Figure S5: ESP map of asymmetric unit of complex II
9. Figure S9: ESP map of asymmetric unit of complex III
10. Figure S10: ESP map of asymmetric unit of complex V

**CCDC No: 2364428**

**Table S1: Coordinates of complex I-V computed at BVP86/LanL2DZ basis set using Gaussian09w suite. QTAIM and NCI studies carried out at BVP86/LanL2DZ basis set using AIMALL professional and Multiwfn software.**

Complex I

Pb4C80N8H48S4O12Br4

|    |                 |                |                 |
|----|-----------------|----------------|-----------------|
| Pb | 1.733280000000  | 0.995750000000 | 0.236407000000  |
| Pb | -1.051353000000 | 1.818100000000 | -3.124629000000 |
| C  | 1.630659000000  | 3.408215000000 | -2.870148000000 |
| C  | 2.958381000000  | 4.066477000000 | -2.807152000000 |
| S  | 3.515702000000  | 5.036816000000 | -4.254331000000 |
| C  | 3.908295000000  | 4.075846000000 | -1.789996000000 |
| H  | 3.776063000000  | 3.555976000000 | -0.835336000000 |
| C  | 5.093797000000  | 4.833996000000 | -2.102557000000 |
| H  | 5.936680000000  | 4.942852000000 | -1.417871000000 |
| C  | 5.048136000000  | 5.407395000000 | -3.365248000000 |
| Br | 6.423782000000  | 6.504574000000 | -4.187595000000 |
| C  | 4.322195000000  | 2.835222000000 | 3.466150000000  |
| C  | 5.299837000000  | 3.822226000000 | 3.524474000000  |
| H  | 5.648721000000  | 4.325506000000 | 2.620550000000  |
| C  | 5.782669000000  | 4.106051000000 | 4.851903000000  |
| H  | 6.547286000000  | 4.851371000000 | 5.078923000000  |
| C  | 5.161030000000  | 3.325247000000 | 5.817084000000  |
| S  | 3.931021000000  | 2.190483000000 | 5.125694000000  |
| Br | 5.493631000000  | 3.378497000000 | 7.730984000000  |
| O  | 1.206473000000  | 2.713428000000 | -1.836500000000 |
| O  | 0.918601000000  | 3.540231000000 | -3.960763000000 |
| O  | 2.749944000000  | 1.325914000000 | 2.455596000000  |
| O  | 3.859158000000  | 2.848433000000 | 1.111550000000  |
| O  | -0.042867000000 | 0.260492000000 | 1.518877000000  |
| O  | -2.221706000000 | 1.540550000000 | -1.097643000000 |
| N  | 0.525362000000  | 2.926093000000 | 1.208504000000  |
| N  | -1.854913000000 | 3.969652000000 | -2.332606000000 |
| N  | -3.623140000000 | 1.751090000000 | -3.977171000000 |
| N  | -1.695751000000 | 2.918476000000 | -5.613494000000 |
| C  | 3.611290000000  | 2.314630000000 | 2.268163000000  |
| C  | 0.817825000000  | 4.227961000000 | 1.007725000000  |
| H  | 1.560153000000  | 4.445624000000 | 0.236956000000  |
| C  | 0.194594000000  | 5.264932000000 | 1.764860000000  |
| H  | 0.468570000000  | 6.305429000000 | 1.570140000000  |
| C  | -0.746389000000 | 4.929759000000 | 2.743976000000  |
| H  | -1.232665000000 | 5.709132000000 | 3.341997000000  |
| C  | -1.088107000000 | 3.556771000000 | 2.972328000000  |

|   |                 |                 |                 |
|---|-----------------|-----------------|-----------------|
| C | -2.048058000000 | 3.122096000000  | 3.942743000000  |
| H | -2.556733000000 | 3.862946000000  | 4.569380000000  |
| C | -2.325157000000 | 1.755451000000  | 4.071600000000  |
| H | -3.060200000000 | 1.416417000000  | 4.810656000000  |
| C | -1.673471000000 | 0.777073000000  | 3.260788000000  |
| H | -1.917312000000 | -0.284388000000 | 3.371096000000  |
| C | -0.706674000000 | 1.162378000000  | 2.307210000000  |
| C | -0.414892000000 | 2.572290000000  | 2.159216000000  |
| C | -1.616249000000 | 5.150290000000  | -2.944338000000 |
| H | -0.927864000000 | 5.121512000000  | -3.792345000000 |
| C | -2.213692000000 | 6.363848000000  | -2.490998000000 |
| H | -1.989142000000 | 7.297205000000  | -3.014694000000 |
| C | -3.075505000000 | 6.333938000000  | -1.389560000000 |
| H | -3.553377000000 | 7.252902000000  | -1.030216000000 |
| C | -3.340646000000 | 5.098153000000  | -0.712110000000 |
| C | -4.205983000000 | 4.982768000000  | 0.421263000000  |
| H | -4.710679000000 | 5.873079000000  | 0.811976000000  |
| C | -4.390825000000 | 3.725493000000  | 1.014828000000  |
| H | -5.048014000000 | 3.627830000000  | 1.886331000000  |
| C | -3.738330000000 | 2.557824000000  | 0.525659000000  |
| H | -3.887393000000 | 1.595720000000  | 1.025418000000  |
| C | -2.870335000000 | 2.618066000000  | -0.590335000000 |
| C | -2.683576000000 | 3.914385000000  | -1.224071000000 |
| C | -4.562388000000 | 1.186678000000  | -3.181124000000 |
| H | -4.218364000000 | 0.881828000000  | -2.190967000000 |
| C | -5.907606000000 | 0.979679000000  | -3.601449000000 |
| H | -6.619516000000 | 0.520082000000  | -2.911143000000 |
| C | -6.280215000000 | 1.353850000000  | -4.896660000000 |
| H | -7.302862000000 | 1.196235000000  | -5.256986000000 |
| C | -5.309417000000 | 1.937929000000  | -5.767863000000 |
| C | -3.976236000000 | 2.128858000000  | -5.257373000000 |
| C | -5.625515000000 | 2.328561000000  | -7.123785000000 |
| H | -6.646149000000 | 2.167987000000  | -7.489744000000 |
| C | -4.662737000000 | 2.884258000000  | -7.946420000000 |
| H | -4.906077000000 | 3.172724000000  | -8.975510000000 |
| C | -3.314858000000 | 3.095759000000  | -7.468259000000 |
| C | -2.964669000000 | 2.726326000000  | -6.119917000000 |
| C | -2.291416000000 | 3.667509000000  | -8.286433000000 |

|    |                 |                 |                 |
|----|-----------------|-----------------|-----------------|
| H  | -2.524766000000 | 3.956948000000  | -9.317422000000 |
| C  | -1.006470000000 | 3.850436000000  | -7.760728000000 |
| H  | -0.201926000000 | 4.285705000000  | -8.360227000000 |
| C  | -0.746009000000 | 3.465753000000  | -6.412581000000 |
| H  | 0.233373000000  | 3.604494000000  | -5.943922000000 |
| Pb | -1.733280000000 | -0.995750000000 | -0.236407000000 |
| Pb | 1.051353000000  | -1.818100000000 | 3.124629000000  |
| C  | -1.630659000000 | -3.408215000000 | 2.870148000000  |
| C  | -2.958381000000 | -4.066477000000 | 2.807152000000  |
| S  | -3.515702000000 | -5.036816000000 | 4.254331000000  |
| C  | -3.908295000000 | -4.075846000000 | 1.789996000000  |
| H  | -3.776063000000 | -3.555976000000 | 0.835336000000  |
| C  | -5.093797000000 | -4.833996000000 | 2.102557000000  |
| H  | -5.936680000000 | -4.942852000000 | 1.417871000000  |
| C  | -5.048136000000 | -5.407395000000 | 3.365248000000  |
| Br | -6.423782000000 | -6.504574000000 | 4.187595000000  |
| C  | -4.322195000000 | -2.835222000000 | -3.466150000000 |
| C  | -5.299837000000 | -3.822226000000 | -3.524474000000 |
| H  | -5.648721000000 | -4.325506000000 | -2.620550000000 |
| C  | -5.782669000000 | -4.106051000000 | -4.851903000000 |
| H  | -6.547286000000 | -4.851371000000 | -5.078923000000 |
| C  | -5.161030000000 | -3.325247000000 | -5.817084000000 |
| S  | -3.931021000000 | -2.190483000000 | -5.125694000000 |
| Br | -5.493631000000 | -3.378497000000 | -7.730984000000 |
| O  | -1.206473000000 | -2.713428000000 | 1.836500000000  |
| O  | -0.918601000000 | -3.540231000000 | 3.960763000000  |
| O  | -2.749944000000 | -1.325914000000 | -2.455596000000 |
| O  | -3.859158000000 | -2.848433000000 | -1.111550000000 |
| O  | 0.042867000000  | -0.260492000000 | -1.518877000000 |
| O  | 2.221706000000  | -1.540550000000 | 1.097643000000  |
| N  | -0.525362000000 | -2.926093000000 | -1.208504000000 |
| N  | 1.854913000000  | -3.969652000000 | 2.332606000000  |
| N  | 3.623140000000  | -1.751090000000 | 3.977171000000  |
| N  | 1.695751000000  | -2.918476000000 | 5.613494000000  |
| C  | -3.611290000000 | -2.314630000000 | -2.268163000000 |
| C  | -0.817825000000 | -4.227961000000 | -1.007725000000 |
| H  | -1.560153000000 | -4.445624000000 | -0.236956000000 |
| C  | -0.194594000000 | -5.264932000000 | -1.764860000000 |
| H  | -0.468570000000 | -6.305429000000 | -1.570140000000 |
| C  | 0.746389000000  | -4.929759000000 | -2.743976000000 |
| H  | 1.232665000000  | -5.709132000000 | -3.341997000000 |
| C  | 1.088107000000  | -3.556771000000 | -2.972328000000 |
| C  | 2.048058000000  | -3.122096000000 | -3.942743000000 |

|    |                 |                 |                 |
|----|-----------------|-----------------|-----------------|
| H  | 2.556733000000  | -3.862946000000 | -4.569380000000 |
| C  | 2.325157000000  | -1.755451000000 | -4.071600000000 |
| H  | 3.060200000000  | -1.416417000000 | -4.810656000000 |
| C  | 1.673471000000  | -0.777073000000 | -3.260788000000 |
| H  | 1.917312000000  | 0.284388000000  | -3.371096000000 |
| C  | 0.706674000000  | -1.162378000000 | -2.307210000000 |
| C  | 0.414892000000  | -2.572290000000 | -2.159216000000 |
| C  | 1.616249000000  | -5.150290000000 | 2.944338000000  |
| H  | 0.927864000000  | -5.121512000000 | 3.792345000000  |
| C  | 2.213692000000  | -6.363848000000 | 2.490998000000  |
| H  | 1.989142000000  | -7.297205000000 | 3.014694000000  |
| C  | 3.075505000000  | -6.333938000000 | 1.389560000000  |
| H  | 3.553377000000  | -7.252902000000 | 1.030216000000  |
| C  | 3.340646000000  | -5.098153000000 | 0.712110000000  |
| C  | 4.205983000000  | -4.982768000000 | -0.421263000000 |
| H  | 4.710679000000  | -5.873079000000 | -0.811976000000 |
| C  | 4.390825000000  | -3.725493000000 | -1.014828000000 |
| H  | 5.048014000000  | -3.627830000000 | -1.886331000000 |
| C  | 3.738330000000  | -2.557824000000 | -0.525659000000 |
| H  | 3.887393000000  | -1.595720000000 | -1.025418000000 |
| C  | 2.870335000000  | -2.618066000000 | 0.590335000000  |
| C  | 2.683576000000  | -3.914385000000 | 1.224071000000  |
| C  | 4.562388000000  | -1.186678000000 | 3.181124000000  |
| H  | 4.218364000000  | -0.881828000000 | 2.190967000000  |
| C  | 5.907606000000  | -0.979679000000 | 3.601449000000  |
| H  | 6.619516000000  | -0.520082000000 | 2.911143000000  |
| C  | 6.280215000000  | -1.353850000000 | 4.896660000000  |
| H  | 7.302862000000  | -1.196235000000 | 5.256986000000  |
| C  | 5.309417000000  | -1.937929000000 | 5.767863000000  |
| C  | 3.976236000000  | -2.128858000000 | 5.257373000000  |
| C  | 5.625515000000  | -2.328561000000 | 7.123785000000  |
| H  | 6.646149000000  | -2.167987000000 | 7.489744000000  |
| C  | 4.662737000000  | -2.884258000000 | 7.946420000000  |
| H  | 4.906077000000  | -3.172724000000 | 8.975510000000  |
| C  | 3.314858000000  | -3.095759000000 | 7.468259000000  |
| C  | 2.964669000000  | -2.726326000000 | 6.119917000000  |
| C  | 2.291416000000  | -3.667509000000 | 8.286433000000  |
| H  | 2.524766000000  | -3.956948000000 | 9.317422000000  |
| C  | 1.006470000000  | -3.850436000000 | 7.760728000000  |
| H  | -0.201926000000 | 4.285705000000  | -8.360227000000 |
| C  | -0.746009000000 | 3.465753000000  | -6.412581000000 |
| H  | 0.233373000000  | 3.604494000000  | -5.943922000000 |
| Pb | -1.733280000000 | -0.995750000000 | -0.236407000000 |
| Pb | 1.051353000000  | -1.818100000000 | 3.124629000000  |
| C  | -1.630659000000 | -3.408215000000 | 2.870148000000  |
| C  | -2.958381000000 | -4.066477000000 | 2.807152000000  |
| S  | -3.515702000000 | -5.036816000000 | 4.254331000000  |
| C  | -3.908295000000 | -4.075846000000 | 1.789996000000  |
| H  | -3.776063000000 | -3.555976000000 | 0.835336000000  |
| C  | -5.093797000000 | -4.833996000000 | 2.102557000000  |
| H  | -5.936680000000 | -4.942852000000 | 1.417871000000  |
| C  | -5.048136000000 | -5.407395000000 | 3.365248000000  |
| Br | -6.423782000000 | -6.504574000000 | 4.187595000000  |
| C  | -4.322195000000 | -2.835222000000 | -3.466150000000 |
| C  | -5.299837000000 | -3.822226000000 | -3.524474000000 |
| H  | -5.648721000000 | -4.325506000000 | -2.620550000000 |
| C  | -5.782669000000 | -4.106051000000 | -4.851903000000 |
| H  | -6.547286000000 | -4.851371000000 | -5.078923000000 |
| C  | -5.161030000000 | -3.325247000000 | -5.817084000000 |
| S  | -3.931021000000 | -2.190483000000 | -5.125694000000 |
| Br | -5.493631000000 | -3.378497000000 | -7.730984000000 |
| O  | -1.206473000000 | -2.713428000000 | 1.836500000000  |
| O  | -0.918601000000 | -3.540231000000 | 3.960763000000  |
| O  | -2.749944000000 | -1.325914000000 | -2.455596000000 |
| O  | -3.859158000000 | -2.848433000000 | -1.111550000000 |
| O  | 0.042867000000  | -0.260492000000 | -1.518877000000 |
| O  | 2.221706000000  | -1.540550000000 | 1.097643000000  |
| N  | -0.525362000000 | -2.926093000000 | -1.208504000000 |
| N  | 1.854913000000  | -3.969652000000 | 2.332606000000  |
| N  | 3.623140000000  | -1.751090000000 | 3.977171000000  |
| N  | 1.695751000000  | -2.918476000000 | 5.613494000000  |
| C  | -3.611290000000 | -2.314630000000 | -2.268163000000 |
| C  | -0.817825000000 | -4.227961000000 | -1.007725000000 |
| H  | -1.560153000000 | -4.445624000000 | -0.236956000000 |
| C  | -0.194594000000 | -5.264932000000 | -1.764860000000 |
| H  | -0.468570000000 | -6.305429000000 | -1.570140000000 |
| C  | 0.746389000000  | -4.929759000000 | -2.743976000000 |
| H  | 1.232665000000  | -5.709132000000 | -3.341997000000 |
| C  | 1.088107000000  | -3.556771000000 | -2.972328000000 |
| C  | 2.048058000000  | -3.122096000000 | -3.942743000000 |

## Complex II

### Pb4C76N8H48S4O12Cl4

|    |                 |                 |                 |
|----|-----------------|-----------------|-----------------|
| Pb | -1.036716000000 | -1.679718000000 | 0.418465000000  |
| Pb | -3.404251000000 | 1.612876000000  | -0.168488000000 |
| N  | -0.803453000000 | -2.454996000000 | -1.920558000000 |
| C  | -3.172589000000 | 2.125192000000  | 3.051755000000  |
| C  | -1.060858000000 | -1.474864000000 | -2.862482000000 |
| N  | -3.570510000000 | 2.832833000000  | 1.929139000000  |
| C  | -3.330465000000 | 2.668403000000  | 4.383914000000  |
| C  | -1.229892000000 | -0.120445000000 | -2.379230000000 |
| C  | -1.476780000000 | 0.898833000000  | -3.324717000000 |
| H  | -1.583228000000 | 1.931537000000  | -2.977544000000 |
| C  | -2.589314000000 | 0.809382000000  | 2.841422000000  |
| C  | -3.889922000000 | 3.984662000000  | 4.488000000000  |
| H  | -4.021643000000 | 4.431946000000  | 5.480244000000  |
| C  | -4.087116000000 | 4.074804000000  | 2.058493000000  |
| H  | -4.348870000000 | 4.587415000000  | 1.129758000000  |
| C  | -1.580813000000 | 0.592233000000  | -4.715562000000 |
| H  | -1.784263000000 | 1.409532000000  | -5.417093000000 |
| C  | -0.614003000000 | -3.731292000000 | -2.316518000000 |
| H  | -0.408773000000 | -4.460330000000 | -1.529939000000 |
| C  | -0.685690000000 | -4.112053000000 | -3.690008000000 |
| H  | -0.531497000000 | -5.160030000000 | -3.961076000000 |
| C  | -4.256686000000 | 4.687659000000  | 3.335554000000  |
| H  | -4.673066000000 | 5.697263000000  | 3.391104000000  |
| C  | -1.427159000000 | -0.714280000000 | -5.195370000000 |
| H  | -1.506133000000 | -0.935915000000 | -6.265373000000 |
| C  | -0.959581000000 | -3.140990000000 | -4.658609000000 |
| H  | -1.025063000000 | -3.411962000000 | -5.718741000000 |
| C  | -1.154612000000 | -1.774838000000 | -4.271791000000 |
| C  | -2.217572000000 | 0.070026000000  | 3.988944000000  |
| H  | -1.775137000000 | -0.922074000000 | 3.856643000000  |
| O  | -2.443839000000 | 0.353017000000  | 1.572288000000  |
| O  | -1.136262000000 | 0.121849000000  | -1.034636000000 |
| O  | -1.201415000000 | 3.239536000000  | -0.385491000000 |
| O  | -3.195357000000 | 4.219361000000  | -0.961555000000 |
| C  | -1.890085000000 | 4.256628000000  | -0.856064000000 |
| C  | -1.181896000000 | 5.487142000000  | -1.280780000000 |
| S  | -2.180878000000 | 6.883981000000  | -1.916089000000 |
| O  | -3.356814000000 | -2.020841000000 | -0.367400000000 |
| O  | -2.631332000000 | -4.123236000000 | 0.265987000000  |
| C  | -4.813403000000 | -3.888258000000 | -0.720770000000 |

|    |                 |                 |                 |
|----|-----------------|-----------------|-----------------|
| C  | -3.524654000000 | -3.326608000000 | -0.241373000000 |
| C  | -5.866922000000 | -3.243842000000 | -1.358195000000 |
| H  | -5.826079000000 | -2.174626000000 | -1.574836000000 |
| S  | -5.147309000000 | -5.670171000000 | -0.511756000000 |
| C  | -6.745500000000 | -5.416843000000 | -1.319029000000 |
| C  | -6.970613000000 | -4.104223000000 | -1.703106000000 |
| H  | -7.877470000000 | -3.771294000000 | -2.210932000000 |
| Cl | -7.867855000000 | -6.798130000000 | -1.561285000000 |
| N  | -5.957668000000 | 2.705325000000  | -0.557542000000 |
| N  | -5.598616000000 | 0.403623000000  | 0.902329000000  |
| C  | -7.086973000000 | 2.017228000000  | -0.183829000000 |
| C  | -6.890964000000 | 0.827421000000  | 0.699697000000  |
| C  | -5.373884000000 | -0.703744000000 | 1.667303000000  |
| H  | -4.327132000000 | -0.999583000000 | 1.758117000000  |
| C  | -6.416493000000 | -1.429922000000 | 2.284474000000  |
| H  | -6.183250000000 | -2.313173000000 | 2.884429000000  |
| C  | -6.079450000000 | 3.797025000000  | -1.371111000000 |
| H  | -5.137015000000 | 4.297645000000  | -1.613251000000 |
| C  | -7.744786000000 | -0.988009000000 | 2.101369000000  |
| H  | -8.580133000000 | -1.517924000000 | 2.569949000000  |
| C  | -7.984833000000 | 0.148158000000  | 1.300126000000  |
| H  | -9.008681000000 | 0.502721000000  | 1.158391000000  |
| C  | 0.176893000000  | 5.788484000000  | -1.279081000000 |
| H  | 0.949720000000  | 5.091679000000  | -0.938238000000 |
| C  | -0.646372000000 | 7.812206000000  | -2.143961000000 |
| C  | 0.486245000000  | 7.108624000000  | -1.768782000000 |
| H  | 1.499314000000  | 7.508510000000  | -1.834571000000 |
| Cl | -0.690699000000 | 9.483411000000  | -2.801246000000 |
| C  | -7.328274000000 | 4.252439000000  | -1.851419000000 |
| H  | -7.376455000000 | 5.132555000000  | -2.498836000000 |
| C  | -8.373031000000 | 2.417196000000  | -0.639538000000 |
| H  | -9.266940000000 | 1.853529000000  | -0.361353000000 |
| C  | -8.493425000000 | 3.544741000000  | -1.478505000000 |
| H  | -9.478351000000 | 3.859990000000  | -1.837878000000 |
| C  | -2.930014000000 | 1.883005000000  | 5.510704000000  |
| H  | -3.050022000000 | 2.284978000000  | 6.522637000000  |
| C  | -2.388510000000 | 0.607044000000  | 5.297060000000  |
| H  | -2.077522000000 | -0.000879000000 | 6.154168000000  |
| Pb | 1.036719000000  | 1.679719000000  | -0.418464000000 |
| Pb | 3.404251000000  | -1.612880000000 | 0.168490000000  |
| N  | 0.803457000000  | 2.454998000000  | 1.920559000000  |

|   |                |                 |                 |
|---|----------------|-----------------|-----------------|
| C | 3.172591000000 | -2.125192000000 | -3.051754000000 |
| C | 1.060862000000 | 1.474865000000  | 2.862483000000  |
| N | 3.570510000000 | -2.832836000000 | -1.929138000000 |
| C | 3.330467000000 | -2.668402000000 | -4.383914000000 |
| C | 1.229896000000 | 0.120446000000  | 2.379232000000  |
| C | 1.476785000000 | -0.898832000000 | 3.324719000000  |
| H | 1.583232000000 | -1.931536000000 | 2.977546000000  |
| C | 2.589317000000 | -0.809381000000 | -2.841419000000 |
| C | 3.889922000000 | -3.984662000000 | -4.488001000000 |
| H | 4.021643000000 | -4.431944000000 | -5.480245000000 |
| C | 4.087114000000 | -4.074807000000 | -2.058494000000 |
| H | 4.348868000000 | -4.587419000000 | -1.129760000000 |
| C | 1.580818000000 | -0.592231000000 | 4.715564000000  |
| H | 1.784268000000 | -1.409530000000 | 5.417095000000  |
| C | 0.614007000000 | 3.731293000000  | 2.316520000000  |
| H | 0.408777000000 | 4.460331000000  | 1.529940000000  |
| C | 0.685693000000 | 4.112055000000  | 3.690009000000  |
| H | 0.531500000000 | 5.160031000000  | 3.961077000000  |
| C | 4.256684000000 | -4.687661000000 | -3.335556000000 |
| H | 4.673063000000 | -5.697264000000 | -3.391107000000 |
| C | 1.427163000000 | 0.714282000000  | 5.195372000000  |
| H | 1.506138000000 | 0.935917000000  | 6.265374000000  |
| C | 0.959585000000 | 3.140991000000  | 4.658610000000  |
| H | 1.025067000000 | 3.411964000000  | 5.718742000000  |
| C | 1.154616000000 | 1.774839000000  | 4.271792000000  |
| C | 2.217577000000 | -0.070024000000 | -3.988941000000 |
| H | 1.775143000000 | 0.922077000000  | -3.856638000000 |
| O | 2.443843000000 | -0.353018000000 | -1.572285000000 |
| O | 1.136266000000 | -0.121848000000 | 1.034638000000  |
| O | 1.201417000000 | -3.239537000000 | 0.385493000000  |
| O | 3.195356000000 | -4.219369000000 | 0.961554000000  |
| C | 1.890083000000 | -4.256632000000 | 0.856064000000  |
| C | 1.181891000000 | -5.487145000000 | 1.280778000000  |
| S | 2.180869000000 | -6.883989000000 | 1.916080000000  |
| O | 3.356818000000 | 2.020848000000  | 0.367397000000  |
| O | 2.631327000000 | 4.123242000000  | -0.265985000000 |
| C | 4.813404000000 | 3.888268000000  | 0.720763000000  |
| C | 3.524654000000 | 3.326616000000  | 0.241371000000  |

|    |                 |                 |                 |
|----|-----------------|-----------------|-----------------|
| C  | 5.866927000000  | 3.243855000000  | 1.358182000000  |
| H  | 5.826087000000  | 2.174638000000  | 1.574821000000  |
| S  | 5.147310000000  | 5.670180000000  | 0.511737000000  |
| C  | 6.745494000000  | 5.416859000000  | 1.319026000000  |
| C  | 6.970616000000  | 4.104239000000  | 1.703093000000  |
| H  | 7.877473000000  | 3.771312000000  | 2.210919000000  |
| Cl | 7.867840000000  | 6.798152000000  | 1.561293000000  |
| N  | 5.957668000000  | -2.705333000000 | 0.557543000000  |
| N  | 5.598619000000  | -0.403628000000 | -0.902324000000 |
| C  | 7.086974000000  | -2.017237000000 | 0.183831000000  |
| C  | 6.890966000000  | -0.827429000000 | -0.699693000000 |
| C  | 5.373888000000  | 0.703741000000  | -1.667296000000 |
| H  | 4.327136000000  | 0.999582000000  | -1.758109000000 |
| C  | 6.416498000000  | 1.429917000000  | -2.284468000000 |
| H  | 6.183256000000  | 2.313169000000  | -2.884421000000 |
| C  | 6.079448000000  | -3.797034000000 | 1.371111000000  |
| H  | 5.137013000000  | -4.297654000000 | 1.613250000000  |
| C  | 7.744790000000  | 0.988001000000  | -2.101365000000 |
| H  | 8.580138000000  | 1.517916000000  | -2.569945000000 |
| C  | 7.984836000000  | -0.148167000000 | -1.300123000000 |
| H  | 9.008684000000  | -0.502732000000 | -1.158389000000 |
| C  | -0.176899000000 | -5.788483000000 | 1.279078000000  |
| H  | -0.949724000000 | -5.091675000000 | 0.938236000000  |
| C  | 0.646360000000  | -7.812207000000 | 2.143959000000  |
| C  | -0.486255000000 | -7.108622000000 | 1.768778000000  |
| H  | -1.499325000000 | -7.508505000000 | 1.834568000000  |
| Cl | 0.690681000000  | -9.483412000000 | 2.801244000000  |
| C  | 7.328272000000  | -4.252450000000 | 1.851419000000  |
| H  | 7.376452000000  | -5.132567000000 | 2.498835000000  |
| C  | 8.373031000000  | -2.417207000000 | 0.639540000000  |
| H  | 9.266941000000  | -1.853540000000 | 0.361356000000  |
| C  | 8.493424000000  | -3.544753000000 | 1.478506000000  |
| H  | 9.478349000000  | -3.860030000000 | 1.837879000000  |
| C  | 2.930017000000  | -1.883001000000 | -5.510703000000 |
| H  | 3.050025000000  | -2.284974000000 | -6.522636000000 |
| C  | 2.388514000000  | -0.607040000000 | -5.297057000000 |
| H  | 2.077528000000  | 0.000884000000  | -6.154165000000 |

### Complex III

#### Pb4C80N8H48S4O12Cl4

|    |                |                |                 |
|----|----------------|----------------|-----------------|
| Pb | 0.937768000000 | 1.730640000000 | -0.428382000000 |
|----|----------------|----------------|-----------------|

|    |                |                 |                |
|----|----------------|-----------------|----------------|
| Pb | 3.455712000000 | -1.437227000000 | 0.188151000000 |
| Cl | 1.094970000000 | -9.412176000000 | 2.883588000000 |

|    |                |                 |                 |
|----|----------------|-----------------|-----------------|
| Cl | 7.546900000000 | 7.102208000000  | 1.654413000000  |
| S  | 4.892104000000 | 5.873382000000  | 0.550767000000  |
| C  | 6.477943000000 | 5.681412000000  | 1.398551000000  |
| C  | 6.737271000000 | 4.380836000000  | 1.801489000000  |
| H  | 7.641486000000 | 4.083140000000  | 2.335300000000  |
| C  | 5.672005000000 | 3.480498000000  | 1.438148000000  |
| H  | 5.661735000000 | 2.412950000000  | 1.666512000000  |
| S  | 2.484125000000 | -6.758546000000 | 1.994439000000  |
| O  | 1.114283000000 | -0.053617000000 | 1.037658000000  |
| O  | 2.445091000000 | -0.241201000000 | -1.566300000000 |
| O  | 3.398284000000 | -4.063799000000 | 1.025887000000  |
| O  | 1.370829000000 | -3.171154000000 | 0.422333000000  |
| O  | 3.232654000000 | 2.163208000000  | 0.394672000000  |
| O  | 2.446852000000 | 4.235353000000  | -0.267710000000 |
| N  | 0.641492000000 | 2.505948000000  | 1.904799000000  |
| N  | 3.689189000000 | -2.670238000000 | -1.895260000000 |
| N  | 6.057074000000 | -2.417394000000 | 0.584093000000  |
| N  | 5.564013000000 | -0.115993000000 | -0.904101000000 |
| C  | 0.955852000000 | 1.549455000000  | 2.853621000000  |
| C  | 1.200283000000 | 0.203252000000  | 2.380446000000  |
| C  | 1.509540000000 | -0.792940000000 | 3.331852000000  |
| H  | 1.677373000000 | -1.820015000000 | 2.992043000000  |
| C  | 1.599433000000 | -0.470307000000 | 4.720111000000  |
| H  | 1.852157000000 | -1.269034000000 | 5.426940000000  |
| C  | 1.371371000000 | 0.828666000000  | 5.190650000000  |
| H  | 1.440003000000 | 1.062582000000  | 6.258754000000  |
| C  | 1.036273000000 | 1.865074000000  | 4.260107000000  |
| C  | 0.765329000000 | 3.221003000000  | 4.637392000000  |
| H  | 0.818817000000 | 3.503637000000  | 5.695150000000  |
| C  | 0.432736000000 | 4.167049000000  | 3.662329000000  |
| H  | 0.218644000000 | 5.206399000000  | 3.925781000000  |
| C  | 0.379430000000 | 3.771982000000  | 2.291983000000  |
| H  | 0.129201000000 | 4.481889000000  | 1.500815000000  |
| C  | 3.274748000000 | -1.985787000000 | -3.026272000000 |
| C  | 2.629111000000 | -0.696989000000 | -2.830293000000 |
| C  | 2.236994000000 | 0.018073000000  | -3.986639000000 |
| H  | 1.745516000000 | 0.988194000000  | -3.864659000000 |
| C  | 2.450027000000 | -0.516178000000 | -5.289592000000 |
| H  | 2.121676000000 | 0.072325000000  | -6.153778000000 |
| C  | 3.053355000000 | -1.766422000000 | -5.489653000000 |
| H  | 3.205005000000 | -2.167169000000 | -6.497827000000 |
| C  | 3.474345000000 | -2.527447000000 | -4.353646000000 |
| C  | 4.091738000000 | -3.818641000000 | -4.443700000000 |
| H  | 4.256380000000 | -4.263959000000 | -5.431900000000 |

|    |                 |                 |                 |
|----|-----------------|-----------------|-----------------|
| C  | 4.472799000000  | -4.500219000000 | -3.283123000000 |
| H  | 4.933576000000  | -5.490893000000 | -3.328366000000 |
| C  | 4.260369000000  | -3.889373000000 | -2.011544000000 |
| H  | 4.532612000000  | -4.385296000000 | -1.076675000000 |
| C  | 7.130893000000  | -1.658898000000 | 0.164337000000  |
| C  | 6.290269000000  | -3.526008000000 | 1.330397000000  |
| H  | 5.397196000000  | -4.088423000000 | 1.619656000000  |
| C  | 7.603686000000  | -3.941060000000 | 1.699917000000  |
| H  | 7.731569000000  | -4.843593000000 | 2.304232000000  |
| C  | 8.703022000000  | -3.185166000000 | 1.274891000000  |
| H  | 9.725201000000  | -3.479736000000 | 1.538421000000  |
| C  | 8.490737000000  | -2.011956000000 | 0.486062000000  |
| C  | 9.580584000000  | -1.187752000000 | 0.013397000000  |
| H  | 10.606771000000 | -1.477444000000 | 0.267497000000  |
| C  | 9.334920000000  | -0.056554000000 | -0.743640000000 |
| H  | 10.163412000000 | 0.565905000000  | -1.100955000000 |
| C  | 7.983412000000  | 0.335990000000  | -1.076792000000 |
| C  | 7.695644000000  | 1.507120000000  | -1.844467000000 |
| H  | 8.520021000000  | 2.133347000000  | -2.203348000000 |
| C  | 6.365752000000  | 1.843602000000  | -2.117492000000 |
| H  | 6.107841000000  | 2.737641000000  | -2.690640000000 |
| C  | 5.323935000000  | 1.007012000000  | -1.622803000000 |
| H  | 4.270614000000  | 1.242234000000  | -1.787325000000 |
| C  | 6.871661000000  | -0.460914000000 | -0.624608000000 |
| C  | 2.098181000000  | -4.155796000000 | 0.909011000000  |
| C  | 1.434311000000  | -5.410240000000 | 1.336312000000  |
| C  | 0.987876000000  | -7.749424000000 | 2.212384000000  |
| C  | -0.169129000000 | -7.097501000000 | 1.818921000000  |
| H  | -1.165046000000 | -7.539512000000 | 1.876304000000  |
| C  | 0.089477000000  | -5.769174000000 | 1.321951000000  |
| H  | -0.709774000000 | -5.110394000000 | 0.966839000000  |
| C  | 3.355959000000  | 3.473445000000  | 0.264087000000  |
| C  | 4.613582000000  | 4.082785000000  | 0.768472000000  |
| Pb | -0.937767000000 | -1.730640000000 | 0.428401000000  |
| Pb | -3.455709000000 | 1.437218000000  | -0.188136000000 |
| Cl | -1.094972000000 | 9.412154000000  | -2.883606000000 |
| Cl | -7.546906000000 | -7.102136000000 | -1.654570000000 |
| S  | -4.892120000000 | -5.873348000000 | -0.550857000000 |
| C  | -6.477949000000 | -5.681350000000 | -1.398655000000 |
| C  | -6.737272000000 | -4.380759000000 | -1.801547000000 |
| H  | -7.641487000000 | -4.083044000000 | -2.335353000000 |
| C  | -5.672006000000 | -3.480436000000 | -1.438180000000 |
| H  | -5.661731000000 | -2.412882000000 | -1.666514000000 |
| S  | -2.484136000000 | 6.758552000000  | -1.994385000000 |

|   |                 |                 |                 |
|---|-----------------|-----------------|-----------------|
| O | -1.114274000000 | 0.053615000000  | -1.037639000000 |
| O | -2.445085000000 | 0.241197000000  | 1.566318000000  |
| O | -3.398286000000 | 4.063781000000  | -1.025874000000 |
| O | -1.370827000000 | 3.171148000000  | -0.422316000000 |
| O | -3.232656000000 | -2.163186000000 | -0.394653000000 |
| O | -2.446866000000 | -4.235352000000 | 0.267675000000  |
| N | -0.641498000000 | -2.505953000000 | -1.904782000000 |
| N | -3.689189000000 | 2.670233000000  | 1.895273000000  |
| N | -6.057073000000 | 2.417380000000  | -0.584082000000 |
| N | -5.564012000000 | 0.115981000000  | 0.904117000000  |
| C | -0.955853000000 | -1.549458000000 | -2.853604000000 |
| C | -1.200277000000 | -0.203253000000 | -2.380428000000 |
| C | -1.509532000000 | 0.792941000000  | -3.331832000000 |
| H | -1.677361000000 | 1.820015000000  | -2.992022000000 |
| C | -1.599428000000 | 0.470309000000  | -4.720091000000 |
| H | -1.852151000000 | 1.269037000000  | -5.426919000000 |
| C | -1.371372000000 | -0.828664000000 | -5.190631000000 |
| H | -1.440007000000 | -1.062580000000 | -6.258735000000 |
| C | -1.036278000000 | -1.865075000000 | -4.260089000000 |
| C | -0.765339000000 | -3.221005000000 | -4.637377000000 |
| H | -0.818829000000 | -3.503637000000 | -5.695135000000 |
| C | -0.432748000000 | -4.167053000000 | -3.662315000000 |
| H | -0.218659000000 | -5.206403000000 | -3.925768000000 |
| C | -0.379439000000 | -3.771988000000 | -2.291968000000 |
| H | -0.129210000000 | -4.481898000000 | -1.500802000000 |
| C | -3.274742000000 | 1.985787000000  | 3.026285000000  |
| C | -2.629101000000 | 0.696991000000  | 2.830309000000  |
| C | -2.236975000000 | -0.018064000000 | 3.986657000000  |
| H | -1.745493000000 | -0.988184000000 | 3.864679000000  |
| C | -2.450005000000 | 0.516191000000  | 5.289609000000  |
| H | -2.121648000000 | -0.072306000000 | 6.153796000000  |
| C | -3.053338000000 | 1.766433000000  | 5.489666000000  |
| H | -3.204987000000 | 2.167184000000  | 6.497840000000  |
| C | -3.474337000000 | 2.527452000000  | 4.353658000000  |
| C | -4.091735000000 | 3.818643000000  | 4.443710000000  |

### Complex IV

#### Pb4C80N8H48S4O12Cl4

|    |                 |                |                 |
|----|-----------------|----------------|-----------------|
| Pb | 1.731955000000  | 0.996854000000 | 0.235446000000  |
| Pb | -1.054095000000 | 1.817512000000 | -3.123226000000 |
| C  | 1.628303000000  | 3.408735000000 | -2.869505000000 |
| C  | 2.956627000000  | 4.065268000000 | -2.804513000000 |
| S  | 3.514053000000  | 5.035498000000 | -4.253359000000 |

|   |                  |                 |                 |
|---|------------------|-----------------|-----------------|
| H | -4.256374000000  | 4.263964000000  | 5.431909000000  |
| C | -4.472802000000  | 4.500216000000  | 3.283131000000  |
| H | -4.933581000000  | 5.490888000000  | 3.328372000000  |
| C | -4.260372000000  | 3.889366000000  | 2.011554000000  |
| H | -4.532618000000  | 4.385288000000  | 1.076684000000  |
| C | -7.130891000000  | 1.658882000000  | -0.164330000000 |
| C | -6.290267000000  | 3.525990000000  | -1.330391000000 |
| H | -5.397194000000  | 4.088407000000  | -1.619649000000 |
| C | -7.603684000000  | 3.941038000000  | -1.699920000000 |
| H | -7.731567000000  | 4.843569000000  | -2.304237000000 |
| C | -8.703020000000  | 3.185141000000  | -1.274897000000 |
| H | -9.725198000000  | 3.479706000000  | -1.538434000000 |
| C | -8.490734000000  | 2.011933000000  | -0.486063000000 |
| C | -9.580581000000  | 1.187726000000  | -0.013404000000 |
| H | -10.606768000000 | 1.477414000000  | -0.267512000000 |
| C | -9.334918000000  | 0.056529000000  | 0.743634000000  |
| H | -10.163409000000 | -0.565934000000 | 1.100943000000  |
| C | -7.983410000000  | -0.336010000000 | 1.076793000000  |
| C | -7.695643000000  | -1.507142000000 | 1.844466000000  |
| H | -8.520020000000  | -2.133373000000 | 2.203340000000  |
| C | -6.365752000000  | -1.843621000000 | 2.117496000000  |
| H | -6.107841000000  | -2.737663000000 | 2.690642000000  |
| C | -5.323935000000  | -1.007028000000 | 1.622813000000  |
| H | -4.270614000000  | -1.242250000000 | 1.787337000000  |
| C | -6.871660000000  | 0.460898000000  | 0.624617000000  |
| C | -2.098183000000  | 4.155784000000  | -0.908999000000 |
| C | -1.434316000000  | 5.410229000000  | -1.336303000000 |
| C | -0.987879000000  | 7.749407000000  | -2.212388000000 |
| C | 0.169128000000   | 7.097476000000  | -1.818948000000 |
| H | 1.165048000000   | 7.539474000000  | -1.876362000000 |
| C | -0.089479000000  | 5.769153000000  | -1.321966000000 |
| H | 0.709775000000   | 5.110361000000  | -0.966883000000 |
| C | -3.355966000000  | -3.473426000000 | -0.264108000000 |
| C | -4.613589000000  | -4.082747000000 | -0.768517000000 |

|   |                |                |                 |
|---|----------------|----------------|-----------------|
| C | 3.905592000000 | 4.073301000000 | -1.786530000000 |
| H | 3.771514000000 | 3.553075000000 | -0.832284000000 |
| C | 5.092744000000 | 4.830466000000 | -2.097181000000 |
| H | 5.937608000000 | 4.941437000000 | -1.415657000000 |
| C | 5.041762000000 | 5.400128000000 | -3.358795000000 |
| C | 4.322996000000 | 2.825835000000 | 3.471107000000  |
| C | 5.306308000000 | 3.806657000000 | 3.535218000000  |
| H | 5.658987000000 | 4.311872000000 | 2.633861000000  |
| C | 5.790388000000 | 4.081211000000 | 4.864740000000  |

|   |                 |                 |                 |
|---|-----------------|-----------------|-----------------|
| H | 6.559176000000  | 4.818820000000  | 5.101444000000  |
| C | 5.159871000000  | 3.297256000000  | 5.818157000000  |
| S | 3.923785000000  | 2.173035000000  | 5.127161000000  |
| O | 1.202747000000  | 2.714134000000  | -1.836233000000 |
| O | 0.917909000000  | 3.542025000000  | -3.960848000000 |
| O | 2.747001000000  | 1.325603000000  | 2.454904000000  |
| O | 3.861365000000  | 2.850092000000  | 1.116539000000  |
| O | -0.043517000000 | 0.260992000000  | 1.517438000000  |
| O | -2.222205000000 | 1.539696000000  | -1.095388000000 |
| N | 0.524070000000  | 2.926896000000  | 1.208849000000  |
| N | -1.858535000000 | 3.968552000000  | -2.332014000000 |
| N | -3.625447000000 | 1.748616000000  | -3.974489000000 |
| N | -1.697933000000 | 2.912550000000  | -5.613105000000 |
| C | 3.611047000000  | 2.312657000000  | 2.270730000000  |
| C | 0.815920000000  | 4.229016000000  | 1.008895000000  |
| H | 1.556908000000  | 4.447667000000  | 0.237110000000  |
| C | 0.193710000000  | 5.265195000000  | 1.767989000000  |
| H | 0.467182000000  | 6.305922000000  | 1.573814000000  |
| C | -0.745684000000 | 4.928985000000  | 2.748283000000  |
| H | -1.231131000000 | 5.707707000000  | 3.347809000000  |
| C | -1.086830000000 | 3.555721000000  | 2.975851000000  |
| C | -2.045192000000 | 3.119941000000  | 3.947354000000  |
| H | -2.552995000000 | 3.860058000000  | 4.575548000000  |
| C | -2.321818000000 | 1.753133000000  | 4.075379000000  |
| H | -3.055567000000 | 1.413283000000  | 4.815341000000  |
| C | -1.671227000000 | 0.775655000000  | 3.262588000000  |
| H | -1.914562000000 | -0.285998000000 | 3.372282000000  |
| C | -0.706146000000 | 1.162111000000  | 2.307788000000  |
| C | -0.414722000000 | 2.572133000000  | 2.160700000000  |
| C | -1.621752000000 | 5.148992000000  | -2.944848000000 |
| H | -0.934991000000 | 5.120221000000  | -3.794157000000 |
| C | -2.219197000000 | 6.362419000000  | -2.491171000000 |
| H | -1.996285000000 | 7.295611000000  | -3.015849000000 |
| C | -3.079066000000 | 6.332569000000  | -1.388211000000 |
| H | -3.556954000000 | 7.251414000000  | -1.028611000000 |
| C | -3.342307000000 | 5.096971000000  | -0.709681000000 |
| C | -4.205916000000 | 4.981632000000  | 0.425016000000  |
| H | -4.710586000000 | 5.871826000000  | 0.816009000000  |
| C | -4.389338000000 | 3.724529000000  | 1.019343000000  |
| H | -5.045364000000 | 3.626877000000  | 1.891712000000  |
| C | -3.736912000000 | 2.556986000000  | 0.529719000000  |
| H | -3.885008000000 | 1.594948000000  | 1.029897000000  |
| C | -2.870497000000 | 2.617243000000  | -0.587461000000 |
| C | -2.685331000000 | 3.913342000000  | -1.222057000000 |

|    |                 |                 |                 |
|----|-----------------|-----------------|-----------------|
| C  | -4.565089000000 | 1.187110000000  | -3.176840000000 |
| H  | -4.221694000000 | 0.886465000000  | -2.185161000000 |
| C  | -5.909990000000 | 0.978225000000  | -3.597214000000 |
| H  | -6.622482000000 | 0.521852000000  | -2.905362000000 |
| C  | -6.281598000000 | 1.346483000000  | -4.894458000000 |
| H  | -7.303936000000 | 1.187154000000  | -5.254919000000 |
| C  | -5.310214000000 | 1.926860000000  | -5.767481000000 |
| C  | -3.977690000000 | 2.121049000000  | -5.256519000000 |
| C  | -5.625106000000 | 2.310728000000  | -7.125621000000 |
| H  | -6.645004000000 | 2.146980000000  | -7.492202000000 |
| C  | -4.661963000000 | 2.863782000000  | -7.949606000000 |
| H  | -4.904338000000 | 3.146974000000  | -8.980370000000 |
| C  | -3.315022000000 | 3.079477000000  | -7.470643000000 |
| C  | -2.965940000000 | 2.716301000000  | -6.120338000000 |
| C  | -2.291480000000 | 3.649474000000  | -8.289915000000 |
| H  | -2.523942000000 | 3.934149000000  | -9.322414000000 |
| C  | -1.007539000000 | 3.836831000000  | -7.763306000000 |
| H  | -0.203007000000 | 4.270977000000  | -8.363623000000 |
| C  | -0.748096000000 | 3.458119000000  | -6.413284000000 |
| H  | 0.230587000000  | 3.600218000000  | -5.944163000000 |
| Pb | -1.731955000000 | -0.996854000000 | -0.235446000000 |
| Pb | 1.054095000000  | -1.817512000000 | 3.123226000000  |
| C  | -1.628303000000 | -3.408735000000 | 2.869505000000  |
| C  | -2.956627000000 | -4.065268000000 | 2.804513000000  |
| S  | -3.514053000000 | -5.035498000000 | 4.253359000000  |
| C  | -3.905592000000 | -4.073301000000 | 1.786530000000  |
| H  | -3.771514000000 | -3.553075000000 | 0.832284000000  |
| C  | -5.092744000000 | -4.830466000000 | 2.097181000000  |
| H  | -5.937608000000 | -4.941437000000 | 1.415657000000  |
| C  | -5.041762000000 | -5.400128000000 | 3.358795000000  |
| C  | -4.322996000000 | -2.825835000000 | -3.471107000000 |
| C  | -5.306308000000 | -3.806657000000 | -3.535218000000 |
| H  | -5.658987000000 | -4.311872000000 | -2.633861000000 |
| C  | -5.790388000000 | -4.081211000000 | -4.864740000000 |
| H  | -6.559176000000 | -4.818820000000 | -5.101444000000 |
| C  | -5.159871000000 | -3.297256000000 | -5.818157000000 |
| S  | -3.923785000000 | -2.173035000000 | -5.127161000000 |
| O  | -1.202747000000 | -2.714134000000 | 1.836233000000  |
| O  | -0.917909000000 | -3.542025000000 | 3.960848000000  |
| O  | -2.747001000000 | -1.325603000000 | -2.454904000000 |
| O  | -3.861365000000 | -2.850092000000 | -1.116539000000 |
| O  | 0.043517000000  | -0.260992000000 | -1.517438000000 |
| O  | 2.222205000000  | -1.539696000000 | 1.095388000000  |
| N  | -0.524070000000 | -2.926896000000 | -1.208849000000 |



|   |                 |                 |                 |
|---|-----------------|-----------------|-----------------|
| N | 1.858535000000  | -3.968552000000 | 2.332014000000  |
| N | 3.625447000000  | -1.748616000000 | 3.974489000000  |
| N | 1.697933000000  | -2.912550000000 | 5.613105000000  |
| C | -3.611047000000 | -2.312657000000 | -2.270730000000 |
| C | -0.815920000000 | -4.229016000000 | -1.008895000000 |
| H | -1.556908000000 | -4.447667000000 | -0.237110000000 |
| C | -0.193710000000 | -5.265195000000 | -1.767989000000 |
| H | -0.467182000000 | -6.305922000000 | -1.573814000000 |
| C | 0.745684000000  | -4.928985000000 | -2.748283000000 |
| H | 1.231131000000  | -5.707707000000 | -3.347809000000 |
| C | 1.086830000000  | -3.555721000000 | -2.975851000000 |
| C | 2.045192000000  | -3.119941000000 | -3.947354000000 |
| H | 2.552995000000  | -3.860058000000 | -4.575548000000 |
| C | 2.321818000000  | -1.753133000000 | -4.075379000000 |
| H | 3.055567000000  | -1.413283000000 | -4.815341000000 |
| C | 1.671227000000  | -0.775655000000 | -3.262588000000 |
| H | 1.914562000000  | 0.285998000000  | -3.372282000000 |
| C | 0.706146000000  | -1.162111000000 | -2.307788000000 |
| C | 0.414722000000  | -2.572133000000 | -2.160700000000 |
| C | 1.621752000000  | -5.148992000000 | 2.944848000000  |
| H | 0.934991000000  | -5.120221000000 | 3.794157000000  |
| C | 2.219197000000  | -6.362419000000 | 2.491171000000  |
| H | 1.996285000000  | -7.295611000000 | 3.015849000000  |
| C | 3.079066000000  | -6.332569000000 | 1.388211000000  |
| H | 3.556954000000  | -7.251414000000 | 1.028611000000  |
| C | 3.342307000000  | -5.096971000000 | 0.709681000000  |
| C | 4.205916000000  | -4.981632000000 | -0.425016000000 |
| H | 4.710586000000  | -5.871826000000 | -0.816009000000 |
| C | 4.389338000000  | -3.724529000000 | -1.019343000000 |

|    |                 |                 |                 |
|----|-----------------|-----------------|-----------------|
| H  | 5.045364000000  | -3.626877000000 | -1.891712000000 |
| C  | 3.736912000000  | -2.556986000000 | -0.529719000000 |
| H  | 3.885008000000  | -1.594948000000 | -1.029897000000 |
| C  | 2.870497000000  | -2.617243000000 | 0.587461000000  |
| C  | 2.685331000000  | -3.913342000000 | 1.222057000000  |
| C  | 4.565089000000  | -1.187110000000 | 3.176840000000  |
| H  | 4.221694000000  | -0.886465000000 | 2.185161000000  |
| C  | 5.909990000000  | -0.978225000000 | 3.597214000000  |
| H  | 6.622482000000  | -0.521852000000 | 2.905362000000  |
| C  | 6.281598000000  | -1.346483000000 | 4.894458000000  |
| H  | 7.303936000000  | -1.187154000000 | 5.254919000000  |
| C  | 5.310214000000  | -1.926860000000 | 5.767481000000  |
| C  | 3.977690000000  | -2.121049000000 | 5.256519000000  |
| C  | 5.625106000000  | -2.310728000000 | 7.125621000000  |
| H  | 6.645004000000  | -2.146980000000 | 7.492202000000  |
| C  | 4.661963000000  | -2.863782000000 | 7.949606000000  |
| H  | 4.904338000000  | -3.146974000000 | 8.980370000000  |
| C  | 3.315022000000  | -3.079477000000 | 7.470643000000  |
| C  | 2.965940000000  | -2.716301000000 | 6.120338000000  |
| C  | 2.291480000000  | -3.649474000000 | 8.289915000000  |
| H  | 2.523942000000  | -3.934149000000 | 9.322414000000  |
| C  | 1.007539000000  | -3.836831000000 | 7.763306000000  |
| H  | 0.203007000000  | -4.270977000000 | 8.363623000000  |
| C  | 0.748096000000  | -3.458119000000 | 6.413284000000  |
| H  | -0.230587000000 | -3.600218000000 | 5.944163000000  |
| Cl | 6.315491000000  | 6.414292000000  | -4.119275000000 |
| Cl | 5.467614000000  | 3.331879000000  | 7.589092000000  |
| Cl | -6.315491000000 | -6.414292000000 | 4.119275000000  |
| Cl | -5.467614000000 | -3.331879000000 | -7.589092000000 |

## Complex V

### Pb4C80N8H48S4O12Br4

|    |                 |                 |                 |
|----|-----------------|-----------------|-----------------|
| Pb | 1.690474000000  | -1.026621000000 | 0.380382000000  |
| Pb | 2.229363000000  | 3.026150000000  | 0.030740000000  |
| S  | 7.179072000000  | -2.529874000000 | -0.666002000000 |
| C  | 8.477417000000  | -1.519828000000 | -1.423181000000 |
| C  | 8.054622000000  | -0.234205000000 | -1.733010000000 |
| H  | 8.695049000000  | 0.514793000000  | -2.202708000000 |
| C  | 6.678629000000  | -0.007769000000 | -1.370261000000 |
| H  | 6.143028000000  | 0.929334000000  | -1.534272000000 |
| S  | -1.318068000000 | 7.171499000000  | -1.612624000000 |
| O  | 0.943298000000  | 0.693695000000  | -0.985092000000 |

|   |                 |                 |                 |
|---|-----------------|-----------------|-----------------|
| O | 1.980916000000  | 1.370339000000  | 1.683535000000  |
| O | 0.829565000000  | 5.276993000000  | -0.673219000000 |
| O | -0.475765000000 | 3.451157000000  | -0.186074000000 |
| O | 3.886999000000  | -0.156779000000 | -0.378082000000 |
| O | 4.235612000000  | -2.382203000000 | 0.138837000000  |
| N | 1.834880000000  | -1.694454000000 | -1.996352000000 |
| N | 1.795980000000  | 4.066386000000  | 2.182686000000  |
| N | 3.954629000000  | 5.226758000000  | -0.235581000000 |
| N | 4.717486000000  | 2.916123000000  | 1.114579000000  |
| C | 1.628081000000  | -0.653914000000 | -2.884131000000 |
| C | 1.158572000000  | 0.600492000000  | -2.334301000000 |

|   |                |                 |                 |
|---|----------------|-----------------|-----------------|
| C | 0.933977000000 | 1.674799000000  | -3.222534000000 |
| H | 0.565842000000 | 2.626649000000  | -2.826602000000 |
| C | 1.179309000000 | 1.526109000000  | -4.621630000000 |
| H | 1.001403000000 | 2.386190000000  | -5.277453000000 |
| C | 1.633801000000 | 0.318671000000  | -5.165938000000 |
| H | 1.813708000000 | 0.216206000000  | -6.241789000000 |
| C | 1.860613000000 | -0.800877000000 | -4.301409000000 |
| C | 2.307884000000 | -2.084370000000 | -4.755951000000 |
| H | 2.498271000000 | -2.237270000000 | -5.824547000000 |
| C | 2.492751000000 | -3.126778000000 | -3.841935000000 |
| H | 2.829597000000 | -4.115504000000 | -4.165077000000 |
| C | 2.244821000000 | -2.895387000000 | -2.455701000000 |
| H | 2.380978000000 | -3.680623000000 | -1.709289000000 |
| C | 1.782214000000 | 3.196454000000  | 3.260674000000  |
| C | 1.888829000000 | 1.773962000000  | 2.974316000000  |
| C | 1.900861000000 | 0.886591000000  | 4.076634000000  |
| H | 1.970328000000 | -0.188719000000 | 3.885336000000  |
| C | 1.799920000000 | 1.371029000000  | 5.412078000000  |
| H | 1.808754000000 | 0.643700000000  | 6.231781000000  |
| C | 1.681567000000 | 2.739061000000  | 5.698930000000  |
| H | 1.599886000000 | 3.096106000000  | 6.731331000000  |
| C | 1.665077000000 | 3.678760000000  | 4.620312000000  |
| C | 1.535687000000 | 5.095681000000  | 4.798967000000  |
| H | 1.443282000000 | 5.499645000000  | 5.813984000000  |
| C | 1.522426000000 | 5.948044000000  | 3.689733000000  |
| H | 1.412985000000 | 7.030182000000  | 3.803025000000  |
| C | 1.659303000000 | 5.395952000000  | 2.381536000000  |
| H | 1.643868000000 | 6.017988000000  | 1.483095000000  |
| C | 5.262518000000 | 5.111213000000  | 0.188576000000  |
| C | 3.582551000000 | 6.339107000000  | -0.917001000000 |
| H | 2.529072000000 | 6.373806000000  | -1.212200000000 |
| C | 4.491471000000 | 7.397340000000  | -1.213909000000 |
| H | 4.136274000000 | 8.270565000000  | -1.768355000000 |
| C | 5.819800000000 | 7.297362000000  | -0.782308000000 |
| H | 6.541288000000 | 8.095690000000  | -0.990284000000 |
| C | 6.242560000000 | 6.137973000000  | -0.060284000000 |
| C | 7.597417000000 | 5.971081000000  | 0.416404000000  |
| H | 8.325512000000 | 6.766356000000  | 0.218967000000  |
| C | 7.969315000000 | 4.831524000000  | 1.106715000000  |
| H | 8.997364000000 | 4.708493000000  | 1.466647000000  |
| C | 7.016915000000 | 3.774030000000  | 1.364061000000  |
| C | 7.373090000000 | 2.576836000000  | 2.059768000000  |
| H | 8.399688000000 | 2.447003000000  | 2.420015000000  |
| C | 6.409592000000 | 1.582803000000  | 2.260473000000  |

|    |                 |                 |                 |
|----|-----------------|-----------------|-----------------|
| H  | 6.648983000000  | 0.649796000000  | 2.776717000000  |
| C  | 5.089025000000  | 1.788003000000  | 1.766097000000  |
| H  | 4.308423000000  | 1.032648000000  | 1.876293000000  |
| C  | 5.657461000000  | 3.905660000000  | 0.906432000000  |
| C  | -0.339380000000 | 4.690436000000  | -0.609382000000 |
| C  | -1.540483000000 | 5.452807000000  | -1.026381000000 |
| C  | -3.108043000000 | 7.275606000000  | -1.861616000000 |
| C  | -3.771102000000 | 6.105012000000  | -1.522474000000 |
| H  | -4.851626000000 | 5.974450000000  | -1.602193000000 |
| C  | -2.880065000000 | 5.075303000000  | -1.050039000000 |
| H  | -3.235349000000 | 4.087558000000  | -0.738767000000 |
| C  | 4.649639000000  | -1.234754000000 | -0.312403000000 |
| C  | 6.049978000000  | -1.103292000000 | -0.790194000000 |
| Pb | -1.690471000000 | 1.026611000000  | -0.380421000000 |
| Pb | -2.229365000000 | -3.026156000000 | -0.030780000000 |
| S  | -7.179083000000 | 2.529830000000  | 0.665937000000  |
| C  | -8.477388000000 | 1.519815000000  | 1.423225000000  |
| C  | -8.054602000000 | 0.234177000000  | 1.733007000000  |
| H  | -8.695017000000 | -0.514815000000 | 2.202730000000  |
| C  | -6.678623000000 | 0.007732000000  | 1.370212000000  |
| H  | -6.143021000000 | -0.929373000000 | 1.534210000000  |
| S  | 1.318064000000  | -7.171534000000 | 1.612522000000  |
| O  | -0.943293000000 | -0.693703000000 | 0.985054000000  |
| O  | -1.980913000000 | -1.370348000000 | -1.683576000000 |
| O  | -0.829570000000 | -5.276996000000 | 0.673185000000  |
| O  | 0.475765000000  | -3.451164000000 | 0.186041000000  |
| O  | -3.886990000000 | 0.156760000000  | 0.378044000000  |
| O  | -4.235616000000 | 2.382182000000  | -0.138877000000 |
| N  | -1.834877000000 | 1.694446000000  | 1.996313000000  |
| N  | -1.795595000000 | -4.066395000000 | -2.182723000000 |
| N  | -3.954632000000 | -5.226762000000 | 0.235540000000  |
| N  | -4.717484000000 | -2.916130000000 | -1.114627000000 |
| C  | -1.628079000000 | 0.653905000000  | 2.884092000000  |
| C  | -1.158569000000 | -0.600500000000 | 2.334263000000  |
| C  | -0.933976000000 | -1.674807000000 | 3.222496000000  |
| H  | -0.565843000000 | -2.626658000000 | 2.826656000000  |
| C  | -1.179310000000 | -1.526117000000 | 4.621592000000  |
| H  | -1.001406000000 | -2.386198000000 | 5.277416000000  |
| C  | -1.633802000000 | -0.318679000000 | 5.165899000000  |
| H  | -1.813710000000 | -0.216214000000 | 6.241750000000  |
| C  | -1.860612000000 | 0.800869000000  | 4.301371000000  |
| C  | -2.307884000000 | 2.084362000000  | 4.755911000000  |
| H  | -2.498272000000 | 2.237262000000  | 5.824507000000  |
| C  | -2.492750000000 | 3.126770000000  | 3.841895000000  |

|   |                 |                 |                 |
|---|-----------------|-----------------|-----------------|
| H | -2.829597000000 | 4.115495000000  | 4.165037000000  |
| C | -2.244819000000 | 2.895378000000  | 2.455661000000  |
| H | -2.380975000000 | 3.680614000000  | 1.709249000000  |
| C | -1.782207000000 | -3.196466000000 | -3.260712000000 |
| C | -1.888822000000 | -1.773973000000 | -2.974356000000 |
| C | -1.900851000000 | -0.886604000000 | -4.076676000000 |
| H | -1.970317000000 | 0.188707000000  | -3.885380000000 |
| C | -1.799906000000 | -1.371044000000 | -5.412119000000 |
| H | -1.808737000000 | -0.643716000000 | -6.231824000000 |
| C | -1.681553000000 | -2.739077000000 | -5.698969000000 |
| H | -1.599869000000 | -3.096123000000 | -6.731369000000 |
| C | -1.665066000000 | -3.678774000000 | -4.620349000000 |
| C | -1.535676000000 | -5.095695000000 | -4.799001000000 |
| H | -1.443268000000 | -5.499660000000 | -5.814018000000 |
| C | -1.522418000000 | -5.948057000000 | -3.689766000000 |
| H | -1.412977000000 | -7.030195000000 | -3.803056000000 |
| C | -1.659299000000 | -5.395963000000 | -2.381570000000 |
| H | -1.643867000000 | -6.017997000000 | -1.483128000000 |
| C | -5.262520000000 | -5.111217000000 | -0.188621000000 |
| C | -3.582557000000 | -6.339110000000 | 0.916962000000  |
| H | -2.529078000000 | -6.373810000000 | 1.212164000000  |
| C | -4.491478000000 | -7.397342000000 | 1.213871000000  |
| H | -4.136283000000 | -8.270567000000 | 1.768318000000  |
| C | -5.819806000000 | -7.297364000000 | 0.782267000000  |
| H | -6.541295000000 | -8.095691000000 | 0.990242000000  |

|    |                 |                 |                 |
|----|-----------------|-----------------|-----------------|
| C  | -6.242563000000 | -6.137976000000 | 0.060240000000  |
| C  | -7.597419000000 | -5.971084000000 | -0.416452000000 |
| H  | -8.325515000000 | -6.766358000000 | -0.219015000000 |
| C  | -7.969315000000 | -4.831528000000 | -1.106767000000 |
| H  | -8.997363000000 | -4.708497000000 | -1.466702000000 |
| C  | -7.016914000000 | -3.774036000000 | -1.364113000000 |
| C  | -7.373085000000 | -2.576842000000 | -2.059824000000 |
| H  | -8.399683000000 | -2.447010000000 | -2.420073000000 |
| C  | -6.409585000000 | -1.582811000000 | -2.260529000000 |
| H  | -6.648975000000 | -0.649805000000 | -2.776776000000 |
| C  | -5.089021000000 | -1.788011000000 | -1.766149000000 |
| H  | -4.308417000000 | -1.032658000000 | -1.876345000000 |
| C  | -5.657460000000 | -3.905665000000 | -0.906480000000 |
| C  | 0.339376000000  | -4.690442000000 | 0.609352000000  |
| C  | 1.540476000000  | -5.452815000000 | 1.026356000000  |
| C  | 3.108006000000  | -7.275547000000 | 1.861791000000  |
| C  | 3.771080000000  | -6.104988000000 | 1.522556000000  |
| H  | 4.851595000000  | -5.974404000000 | 1.602349000000  |
| C  | 2.880059000000  | -5.075318000000 | 1.050007000000  |
| H  | 3.235346000000  | -4.087575000000 | 0.738729000000  |
| C  | -4.649636000000 | 1.234730000000  | 0.312364000000  |
| C  | -6.049974000000 | 1.103261000000  | 0.790155000000  |
| Br | 10.245516000000 | -2.259689000000 | -1.735495000000 |
| Br | 3.914956000000  | -8.906931000000 | 2.538762000000  |
| Br | -3.915027000000 | 8.907074000000  | -2.538343000000 |

**Table S2: RMSD of complex I**

| Atom Labels | Bond Length (Å) Expt | Bond Length (Å) Opt | RMSD  |
|-------------|----------------------|---------------------|-------|
| Pb1 - O20   | 2.811                | 2.743               | 0.034 |
| Pb1 - O22   | 2.472                | 2.463               | 0.004 |
| Pb1 - O24   | 2.334                | 2.311               | 0.011 |
| Pb1 - O104  | 2.642                | 2.742               | 0.05  |
| Pb1 - O105  | 2.602                | 2.723               | 0.060 |
| Pb2 - O21   | 2.671                | 2.747               | 0.038 |
| Pb2 - O25   | 2.349                | 2.357               | 0.004 |
| Pb81 - O24  | 2.642                | 2.742               | 0.050 |
| Pb81 - O25  | 2.602                | 2.723               | 0.061 |
| Pb81 - O100 | 2.811                | 2.743               | 0.034 |
| Pb81 - O102 | 2.472                | 2.463               | 0.005 |
| Pb81 - O104 | 2.334                | 2.311               | 0.012 |

|             |       |       |       |
|-------------|-------|-------|-------|
| Pb82 - O101 | 2.671 | 2.747 | 0.038 |
| Pb82 - O105 | 2.349 | 2.357 | 0.004 |
| Pb1 - N26   | 2.485 | 2.476 | 0.005 |
| Pb2 - N27   | 2.454 | 2.429 | 0.013 |
| Pb2 - N28   | 2.734 | 2.710 | 0.012 |
| Pb81 - N106 | 2.485 | 2.476 | 0.005 |
| Pb82 - N107 | 2.454 | 2.429 | 0.013 |
| Pb82 - N108 | 2.734 | 2.710 | 0.012 |

**Table S3: Bite angles around the lead centres in complex I**

| 6-coordinated Pb centre |            |
|-------------------------|------------|
| Atom Label              | Bite angle |
| O3-Pb-N                 | 69.83      |
| 7-coordinated Pb centre |            |
| Atom Label              | Bite angle |
| N1-Pb-N2                | 60.73      |
| N3-Pb-O4                | 70.1       |
| O1-Pb-O3                | 49.42      |

**Table S4: Jeffery's classification of Hydrogen Bonds**

| Type             | Strong            | moderate             | weak                       |
|------------------|-------------------|----------------------|----------------------------|
| Interaction type | Strongly covalent | Mostly electrostatic | electrostatic / dispersion |
| Bond length [Å]  | 1.2 - 1.5         | 1.5 - 2.2            | 2.2 - 3.2                  |
| Bond angle [°]   | 175 - 180         | 130 - 180            | 90 - 150                   |

**Table S5: Comparison of total energies of Complexes I, III, IV and V computed at BVP86/LanL2DZ basis set.**

| Complex | Arrangement             | Types of Bonds | Total Energy (Hartree) | Difference (open-close) (Kcal/mol) |
|---------|-------------------------|----------------|------------------------|------------------------------------|
| V       | open Br (Theoretical)   | H-bond         | -9048.464910           | 27.010                             |
| I       | close Br (Experimental) | Tetrel         | -9048.507954           |                                    |
| III     | open Cl (Experimental)  | H-Bond         | -9062.655624           | 64.460                             |
| IV      | close Cl (Theoretical)  | Tetrel         | -9062.758350           |                                    |

**Table S6: Tetrel bond lengths (Å) in the structures of PbII complexes described in literature and in this work.**

| Complex                                        | Bond    | Ligand  | Length Å | Reference    |
|------------------------------------------------|---------|---------|----------|--------------|
| [Pb(L2)(Br)].H2O                               | Pb...Br | L       | 3.375    | 50           |
| Complex I                                      | Pb...Br | BTC     | 3.819    | Present work |
| [Pb(HLV)Cl2] <sub>n</sub>                      | Pb...Cl | Cl-     | 3.382    | 48           |
| [Pb3(LVI)2Cl4] <sub>n</sub> ·nMeOH             | Pb...Cl | Cl-     | 3.440    | 48           |
| [Pb3(LVI)2Cl4] <sub>n</sub> ·nMeOH             | Pb...Cl | Cl-     | 3.467    | 48           |
| [Pb3(LVI)2Cl4] <sub>n</sub> ·nMeOH             | Pb...Cl | Cl-     | 3.490    | 48           |
| [(H2O)(DMSO)NiLPbCl](SCN)                      | Pb...Cl | Cl-     | 3.339    | 7            |
| Complex IV                                     | Pb...Cl | BTC     | 3.863    | Present work |
| [Pb(HL1)(I)2]2                                 | Pb...I  | I-      | 3.575    | 51           |
| [Pb(L)(SCN)] <sub>n</sub>                      | Pb...N  | NCS-    | 3.542    | 51           |
| [(H2O)Ni(SCN)L1 Pb(OAc)].DMSO                  | Pb...N  | NCS-    | 3.379    | 45           |
| [Pb(L)(I)]                                     | Pb...N  | L       | 3.247    | 47           |
| [Pb(L)(μ-NO2)]CH3OH                            | Pb...N  | L       | 3.408    | 47           |
| [Pb(L)(NCS)]2                                  | Pb...N  | L       | 3.195    | 47           |
| [Pb(HLII)Cl2] <sub>n</sub> ·nMeOH              | Pb...N  | L       | 3.391    | 48           |
| [Pb3(LVI)2Cl4] <sub>n</sub> ·nMeOH             | Pb...N  | L       | 3.093    | 48           |
| [Pb3(LVI)2Cl4] <sub>n</sub> ·nMeOH             | Pb...N  | L       | 2.989    | 48           |
| [Pb(MeOH)2(H2L3)(NCS)][NCS]                    | Pb...N  | NCS-    | 3.329    | 50           |
| Pb2(MeOH)2(L1)2(μ1,1-N3)2                      | Pb...N  | L       | 3.200    | 50           |
| [Pb(L1)(CH3COO)]                               | Pb...N  | L       | 2.940    | 51           |
| [Pb2(L2)(CH3COO)(SCN)2]2                       | Pb...N  | L       | 2.978    | 51           |
| [Pb(HL2)2(SCN)2](C2H5OH)                       | Pb...N  | L       | 3.419    | 51           |
| [PbL(NO2)] <sub>n</sub>                        | Pb...N  | L       | 3.235    | 38           |
| [PbL(NO2)] <sub>n</sub>                        | Pb...N  | L       | 3.039    | 38           |
| [Pb2(H2L <sup>II</sup> )(NO3)4]                | Pb...O  | NO3     | 3.061    | 46           |
| [Pb2(HL <sup>II</sup> )(CH3COO)3] <sub>n</sub> | Pb...O  | CH3COO- | 3.518    | 46           |
| [Pb(HL <sup>I</sup> )(NO3)2] <sub>n</sub>      | Pb...O  | NO3     | 3.117    | 46           |
| [Pb(HL)(SCN)2]·CH3OH                           | Pb...S  | NCS-    | 3.041    | 49           |
| [Pb(HL)(SCN)2]·CH3OH                           | Pb...S  | NCS-    | 3.404    | 49           |
| [Pb(HL)(SCN)2]                                 | Pb...S  | NCS-    | 3.473    | 49           |
| [(H2O)Ni(SCN)L1 Pb(OAc)].DMSO                  | Pb...S  | NCS-    | 3.064    | 45           |
| Pb(L4)(NCS)2                                   | Pb...S  | NCS-    | 3.051    | 50           |
| Pb(L5)(NCS)2                                   | Pb...S  | NCS-    | 3.409    | 50           |
| Pb(L5)(NCS)2                                   | Pb...S  | L       | 3.229    | 50           |
| [Pb(HL2)2(SCN)2](C2H5OH)                       | Pb...S  | NCS-    | 3.275    | 51           |
| [Pb2(L2)(CH3COO)(SCN)2]2                       | Pb...S  | NCS-    | 3.022    | 51           |

**Tables7: Electron density (ρ) of Pb tetrel bonds reported in literature and in present work**

| Complex                  | Bond    | ρ x 10 <sup>2</sup> a.u | Reference    |
|--------------------------|---------|-------------------------|--------------|
| [Pb(L1)(CH3COO)]         | Pb...N  | 1.88                    | 51           |
| [Pb2(L2)(CH3COO)(SCN)2]2 | Pb...N  | 1.79                    | 51           |
| [Pb2(L2)(CH3COO)(SCN)2]2 | Pb...N  | 1.75                    | 51           |
| [Pb2(L2)(CH3COO)(SCN)2]2 | Pb...S  | 1.82                    | 51           |
| [Pb(HL2)2(SCN)2](C2H5OH) | Pb...S  | 1.93                    | 51           |
| [Pb(HL1)(I)2]2           | Pb...I  | 1.34                    | 51           |
| [PbL(NO2)] <sub>n</sub>  | Pb...N  | 1.20                    | 39           |
| [PbL(NO2)] <sub>n</sub>  | Pb...N  | 1.76                    | 39           |
| Complex I                | Pb...Br | 0.73                    | present work |
| Complex IV               | Pb...Cl | 0.55                    | Present work |

Figure S1: ORTEP view of complex I showing the atom numbering scheme with displacement ellipsoids drawn at a 50% probability level. Disordered bromine atoms are omitted for clarity. H atoms not involved in hydrogen bonding have been omitted for clarity.

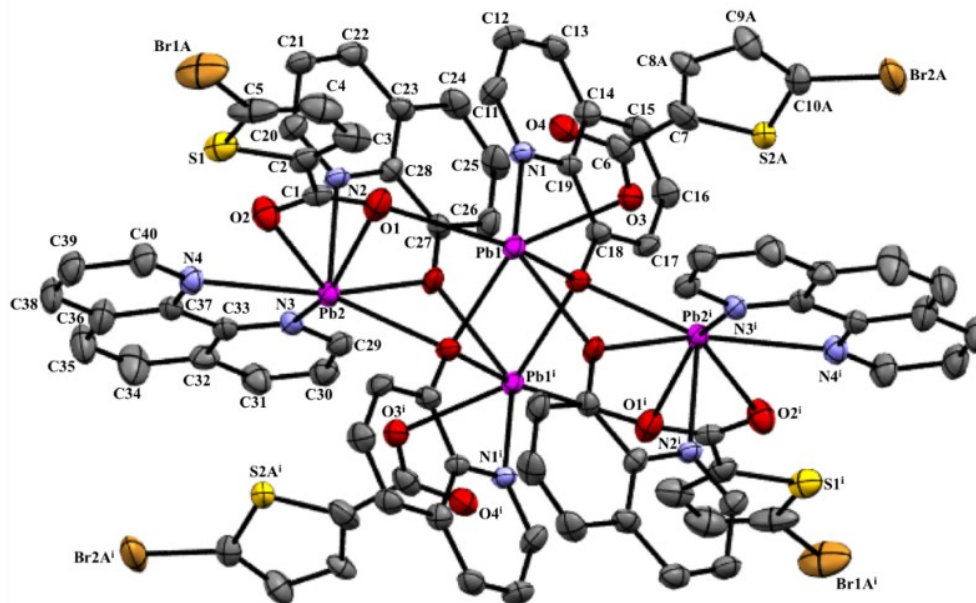

Figure S2: Schematic representation of (i) Hemi-directional and (ii) Holo-directional

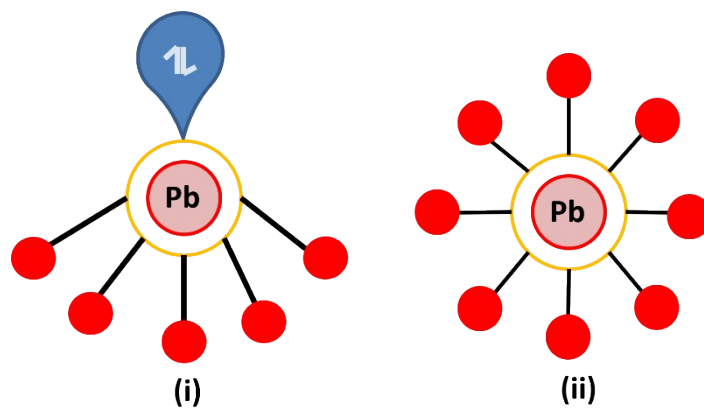

Figure S3: A view of three-dimensional supramolecular architecture in the complex (I) along c-axis and stacked along b-axis in close packed arrangement

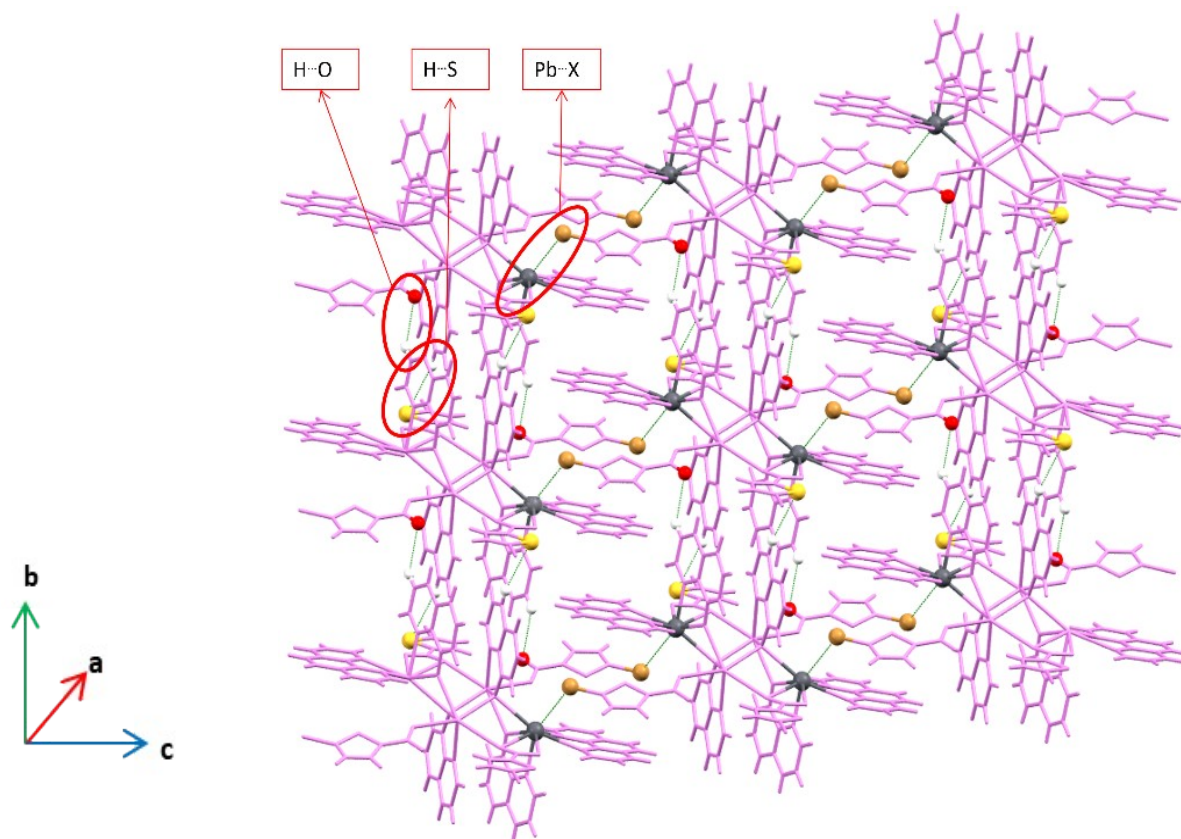

Figure S4: A view of three-dimensional supramolecular architecture in the complex (I) along c-axis and stacked along b-axis in open packed arrangement

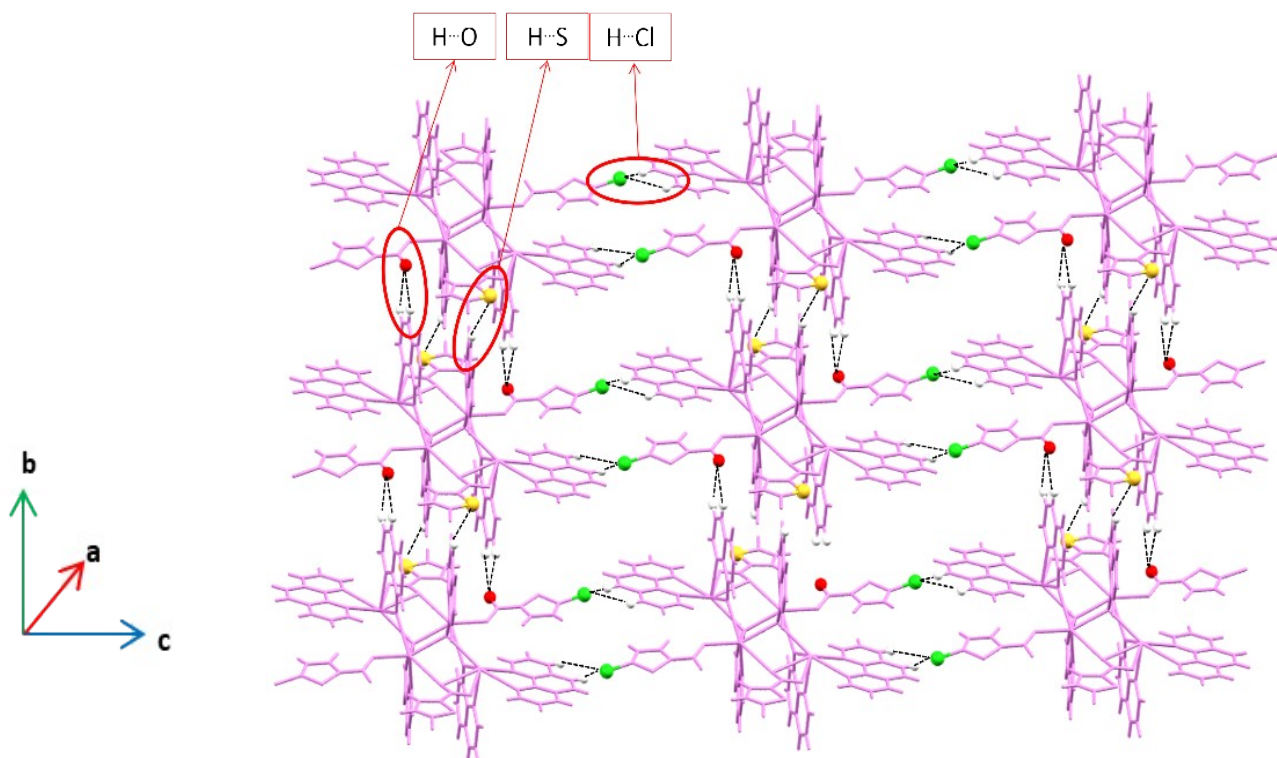

Figure S5: Molecular view of (i) AB and (ii) AC dimers in close packed structures

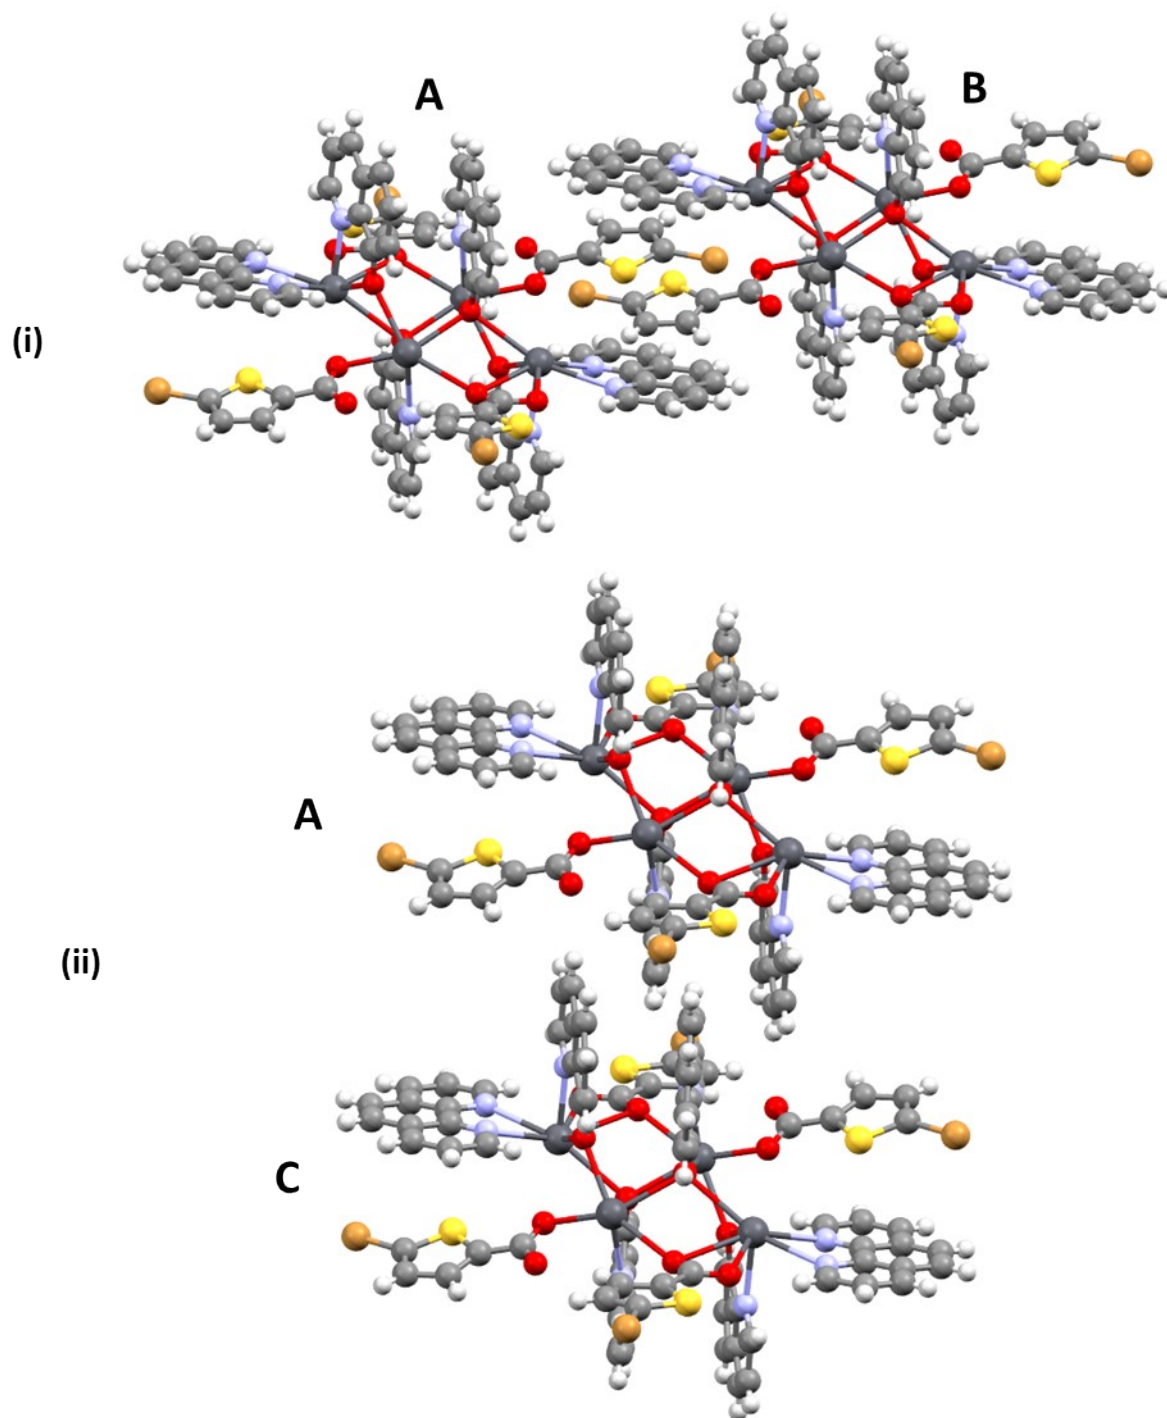



Figure S6: Molecular view of (i) AB and (ii) AC dimers in open packed structures

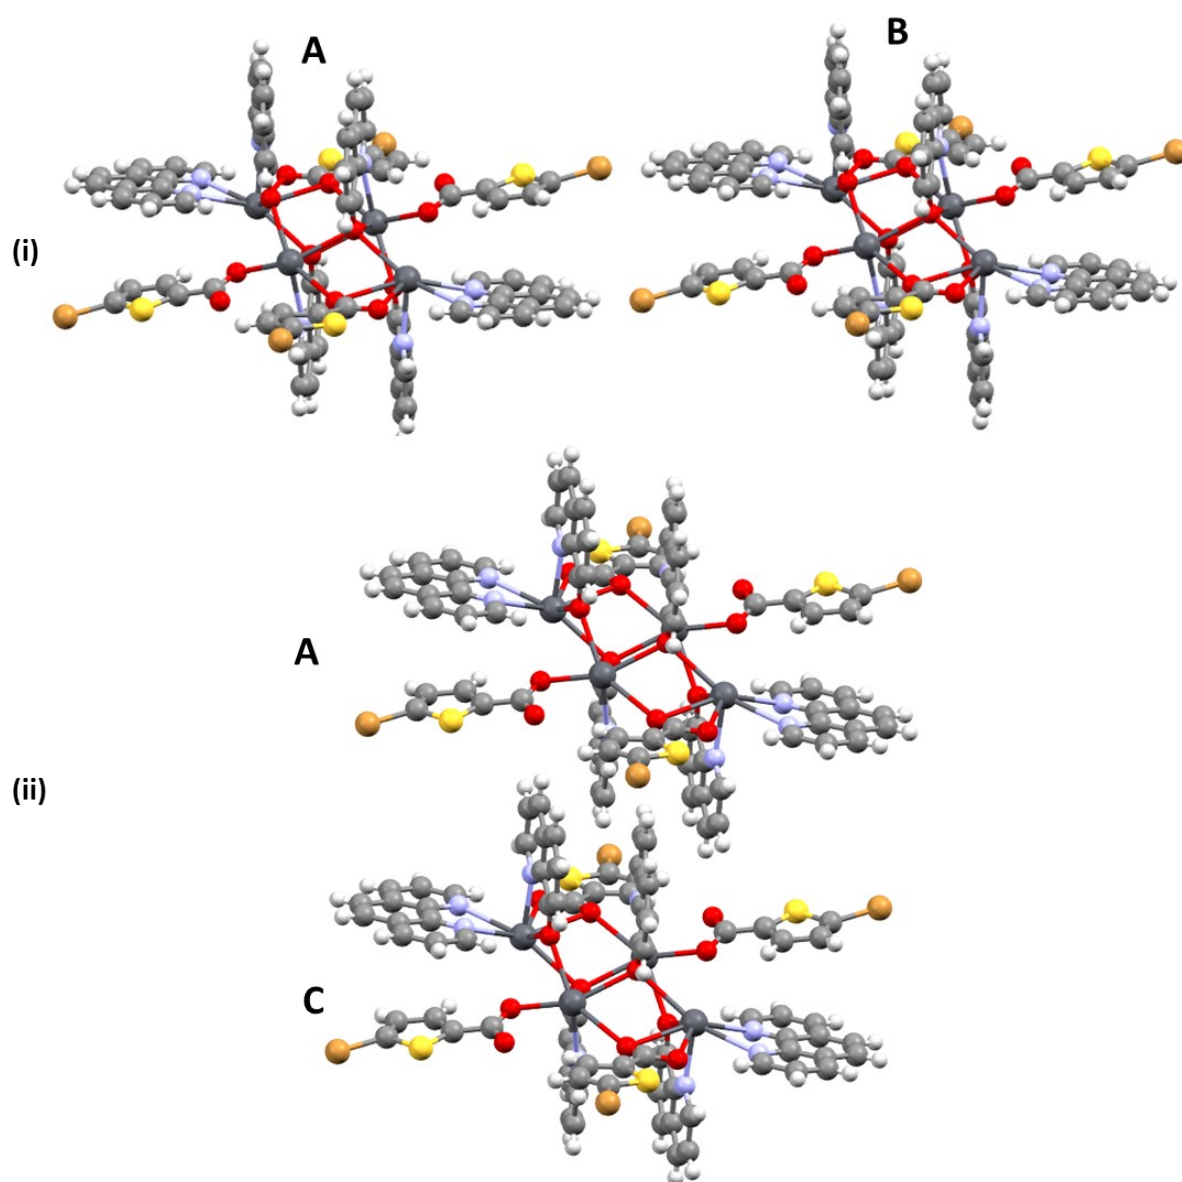

Figure S7: Molecular view of (i) AB and (ii) AC dimers of close packed complex IA where the Br atom involved in tetrel bond is replaced by H.

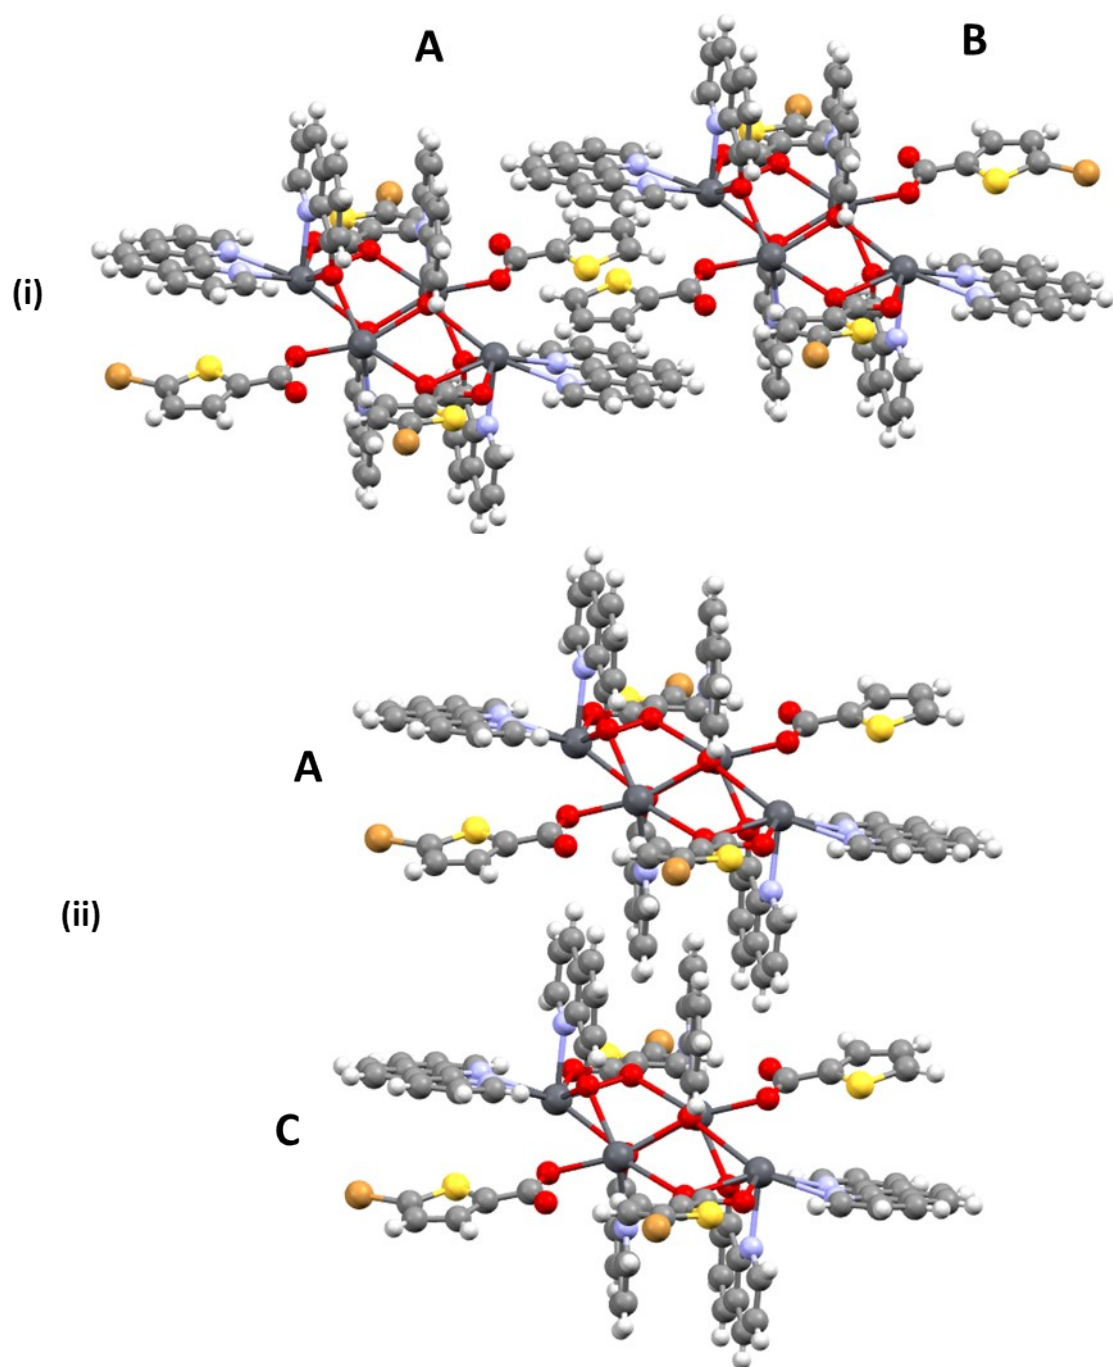

Figure S8: ESP map of asymmetric unit of complex II (computed at BVP86/LanL2DZ basis set using Gaussian 09w suite with isovalue 0.002 a.u.). Other atoms not taking part in intermolecular interactions are removed for clarity. H...Cl hydrogen bonding interactions are denoted by green dotted lines

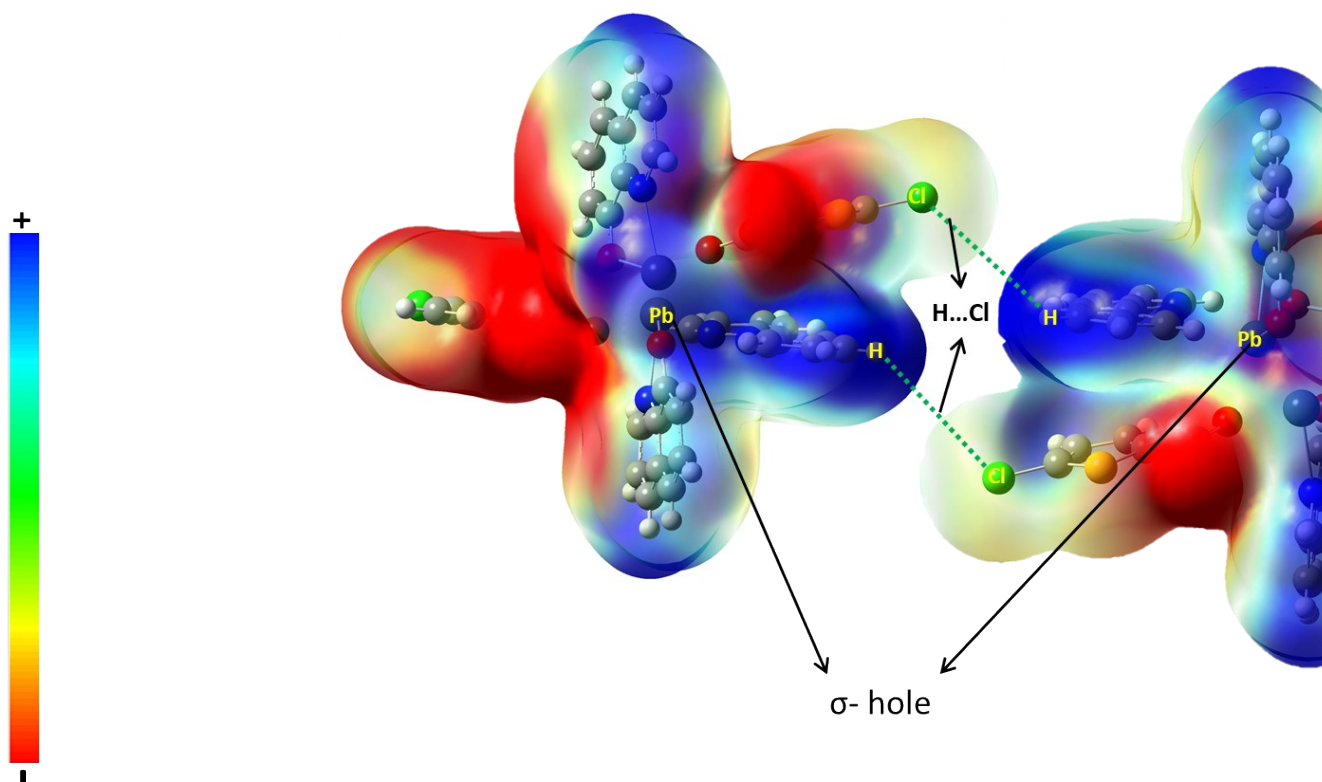

Figure S9: ESP map of asymmetric unit of complex III (computed at BVP86/LanL2DZ basis set using Gaussian 09w suite with isovalue 0.002 a.u.). Other atoms not taking part in intermolecular interactions are removed for clarity. The green dotted lines denote H...Cl hydrogen bonding interactions.

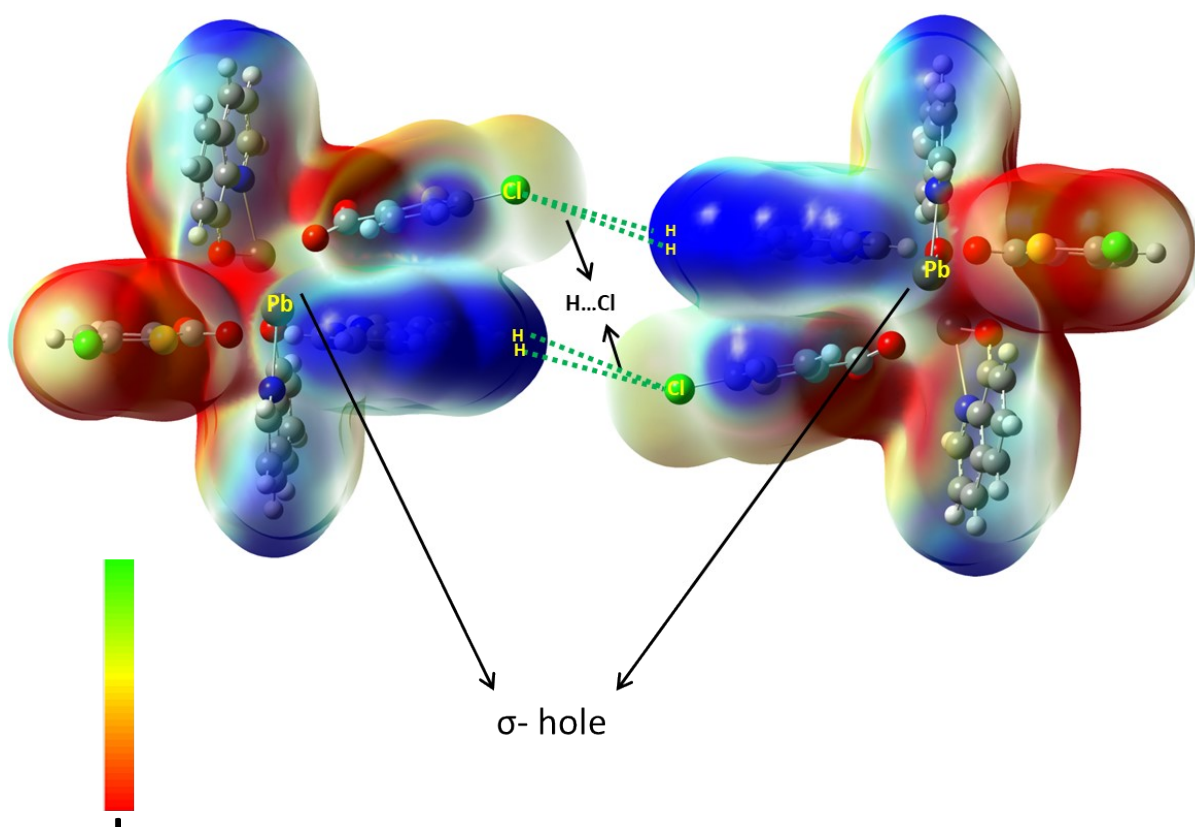

Figure S10: ESP map of asymmetric unit of complex V (computed at BVP86/LanL2DZ basis set using Gaussian 09w suite with isovalue 0.002 a.u.). Other atoms not taking part in intermolecular interactions are removed for clarity. H...Br hydrogen bonding interactions are denoted by green dotted lines.

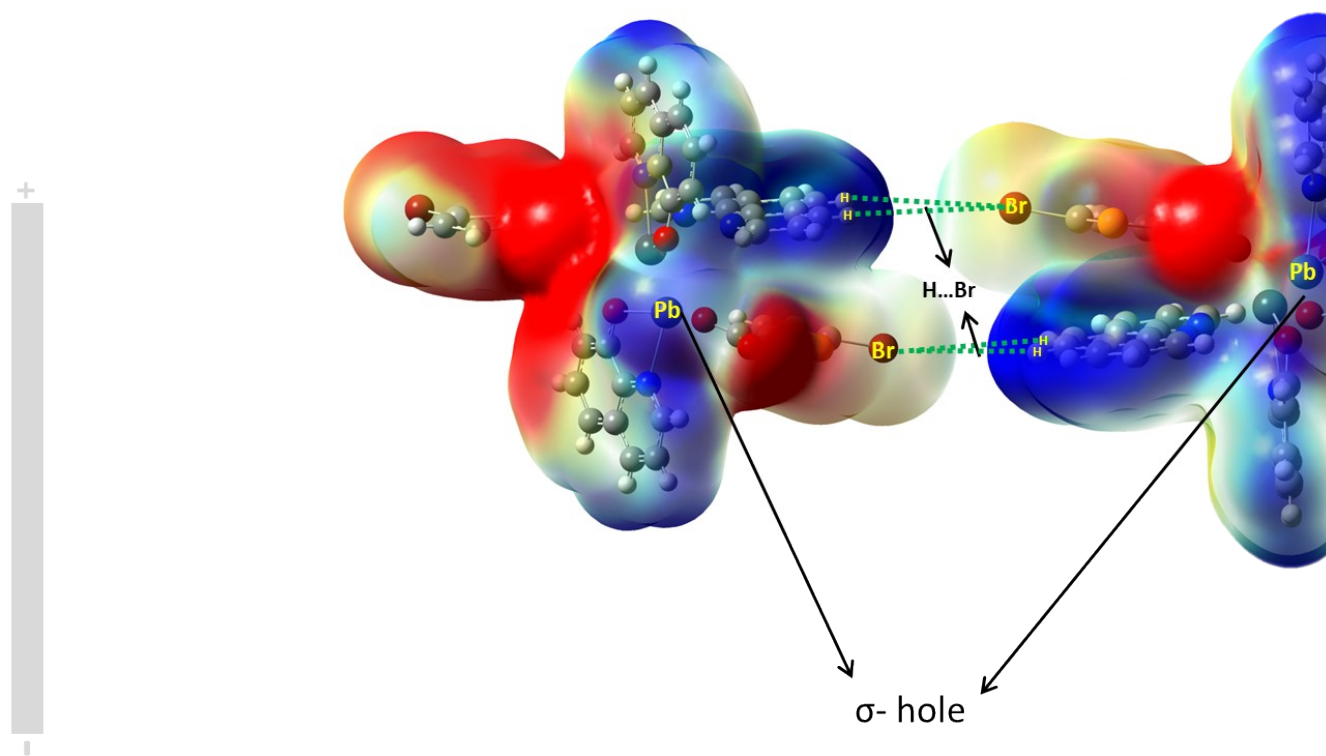

Supplement: d4ce00466c2.pdf [file d4ce00466c2.pdf]
